RESEARCH ARTICLE

# Pre-Holocene Origin for the *Coronopus navasii* Disjunction: Conservation Implications from Its Long Isolation

Sara Martín-Hernanz<sup>1\*</sup>, Alejandro G. Fernández de Castro<sup>2</sup>, Juan Carlos Moreno-Saiz<sup>1</sup>, Virginia Valcárcel<sup>1</sup>

**1** Department of Biology (Botany), Universidad Autónoma de Madrid, Madrid, Spain, **2** Department of Biodiversity and Conservation, Real Jardín Botánico, CSIC, Madrid, Spain

\* [sara.martin.hernanz@gmail.com](mailto:sara.martin.hernanz@gmail.com)

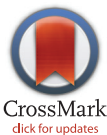

## Abstract

Integration of unexpected discoveries about charismatic species can disrupt their well-established recovery plans, particularly when this requires coordinate actions among the different governments responsible. The Critically Endangered *Coronopus navasii* (Brassicaceae) was considered a restricted endemism to a few Mediterranean temporary ponds in a high mountain range of Southeast Spain, until a new group of populations were discovered 500 km North in 2006. Ten years after this finding, its management has not been accommodated due to limited information of the new populations and administrative inertia. In this study, DNA sequences and species distribution models are used to analyse the origin of the *C. navasii* disjunction as a preliminary step to reassess its recovery plan. Molecular results placed the disjunction during Miocene-Pleistocene (6.30–0.49 Mya, plastid DNA; 1.45–0.03 Mya, ribosomal DNA), which discards a putative human-mediated origin. In fact, the haplotype network and the low gene flow estimated between disjunct areas suggest long-term isolation. Dispersal is the most likely explanation for the disjunction as interpreted from the highly fragmented distribution projected to the past. Particularly, a northward dispersal from Southeast is proposed since *C. navasii* haplotype network is connected to the sister-group through the southern haplotype. Although the reassessment of *C. navasii* conservation status is more optimistic under the new extent of occurrence, its long-term survival may be compromised due to the: (1) natural fragmentation and rarity of the species habitat, (2) genetic isolation between the two disjunct areas, and (3) northward shift of suitable areas under future climate change scenarios. Several *ex-situ* and *in-situ* conservation measures are proposed for integrating Central East Spanish populations into the on-going recovery plan, which still only contemplates Southeast populations and therefore does not preserve the genetic structure and diversity of the species.

## OPEN ACCESS

**Citation:** Martín-Hernanz S, G. Fernández de Castro A, Moreno-Saiz JC, Valcárcel V (2016) Pre-Holocene Origin for the *Coronopus navasii* Disjunction: Conservation Implications from Its Long Isolation. PLoS ONE 11(7): e0159484. doi:10.1371/journal.pone.0159484

**Editor:** Tzen-Yuh Chiang, National Cheng-Kung University, TAIWAN

**Received:** September 29, 2015

**Accepted:** July 5, 2016

**Published:** July 27, 2016

**Copyright:** © 2016 Martín-Hernanz et al. This is an open access article distributed under the terms of the [Creative Commons Attribution License](https://creativecommons.org/licenses/by/4.0/), which permits unrestricted use, distribution, and reproduction in any medium, provided the original author and source are credited.

**Data Availability Statement:** DNA data are available in the GenBank database: <http://www.ncbi.nlm.nih.gov/genbank/>. All relevant data are within the paper and its Supporting Information files.

**Funding:** The study was unfunded. The authors received no specific funding for this work.

**Competing Interests:** The authors have declared that no competing interests exist.

*Rare species are not invariably threatened with imminent extinction. However, those species that are threatened are almost invariably rare.*

– Kevin Gaston

## Introduction

Selection of flagship species is key for effective biodiversity conservation management since they attract the attention of the public and policy administrators. Flagship species normally are endemic taxa restricted to a particular ecosystem, being mammals and birds the most common candidates to play this role [1], with the occasional exception of some plants [2]. The benefits of flagships often go beyond their own conservation improvements since they can also be umbrella species under which protection other species or habitats are also preserved [1].

Well-known threatened species are easy targets of well-supported conservation status assessments and more likely to become flagship species. The more conservation attention received, the more probable new discoveries occurred and resulted in improving the conservation status assessment. Reassessments in the conservation status force the adaptation of the conservation strategy to accommodate management actions. However, the implementation of new measures often faces researchers' or politicians' resistance delaying integration in the ongoing recovery plans [3]. This is the case of *Coronopus navasii* Pau (Brassicaceae), one of the most charismatic species within the broad spectrum of the Spanish plant conservationism [4]. It is an endemic species that has been legally protected under the maximum risk category since the first National Catalogue of Endangered Species published in 1982 [5]. *Coronopus navasii* inhabits temporarily flooded clay ponds in xeric environments at high altitudes where it is locally abundant and dominant [5, 6]. Apart from its local abundance, *C. navasii* satisfies the two remaining features described by Rabinowitz [7] to be considered a rare species, it: (1) shows a high habitat specificity, and (2) was known from just a single metapopulation in the *Sierra de Gádor* mountain range (Andalusia, Southeast Spain). The species is not only a rare plant but it is under decline [8], legitimate condition to be considered as threatened [9]. Population size has been decreasing since the first censuses in the 70s and its local populations suffer from extinctions and severe demographic oscillations [5, 6]. The species decline has been associated to climate change and human impacts such as over-grazing, plowing or the practice of off-road driving. Indeed, *C. navasii* is catalogued under the 'Critically Endangered' IUCN category in both Regional and National Red Lists [8, 10] as well as 'in Danger of Extinction' in the corresponding legal catalogues of protected flora [5, 11]. It is also included in the Bern Convention [12] and as a priority species in the European Habitats Directive [13]. The species is also protected through its habitat since Mediterranean temporary ponds are considered priority habitats belonging to the European Natura 2000 network (Natura 2000 code 3170). Within this legal context, an integrated conservation program was developed on the species and its habitat including *in situ*, *ex situ* and legal measures. As a result, a range of *ex situ* conservation techniques has already been done [14] including the implementation of population reinforcements [5, 15].

Unexpectedly, a new population was discovered in 2004 around 500 km North of *Sierra de Gádor*, in a similar habitat at the continental plateaus of the *Sistema Ibérico*. This population (hereafter called '*Anguita* population', Guadalajara, Central East Spain; Fig 1) was discovered by López-Jiménez and García-Muñoz [16] in a small pool used as a watering hole. These authors suggested long distance dispersal (LDD) as the most plausible explanation for this disjunction between *Sierra de Gádor* and *Sistema Ibérico*, and proposed birds as the likely dispersal vector based on the epizoochory described for the species [5, 17]. The authors discarded

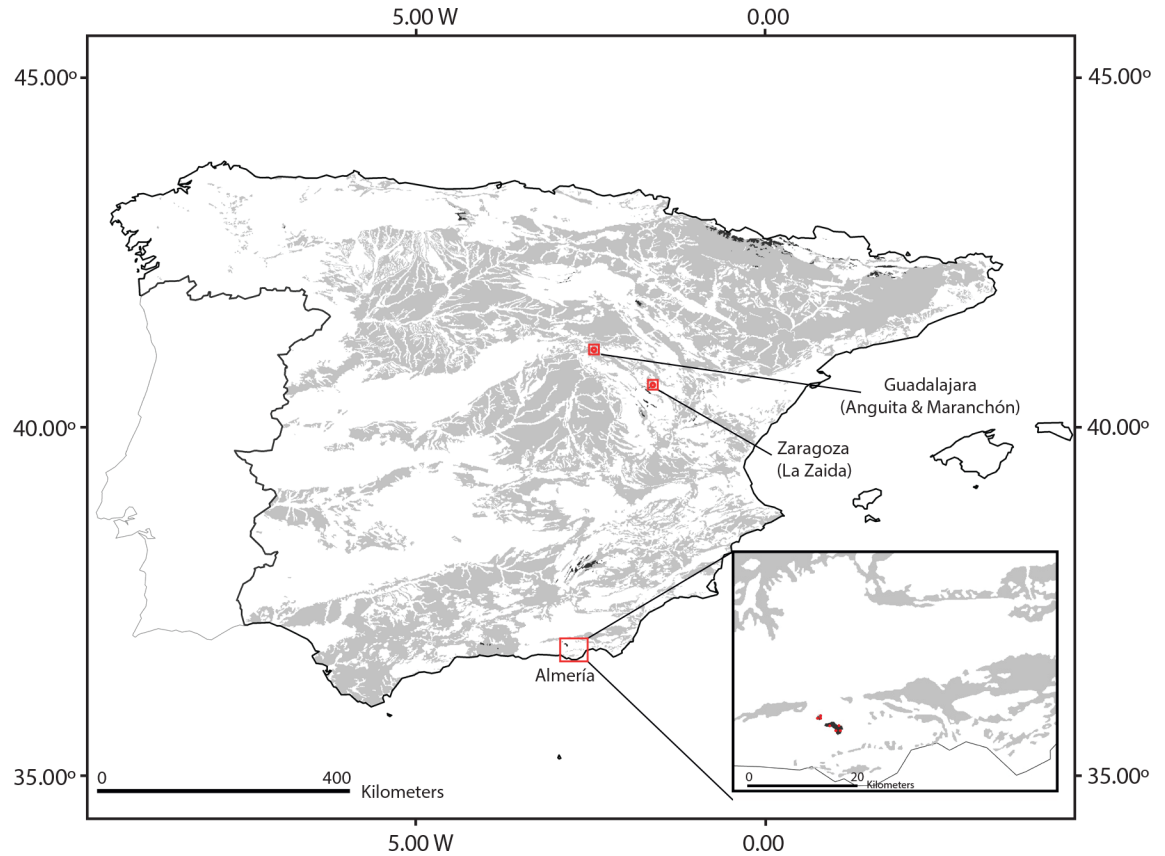

**Fig 1. Distribution range of *Coronopus navasii*.**

doi:10.1371/journal.pone.0159484.g001

vicariance as a plausible explanation due to the natural scattered occurrence of the ponds where *C. navasii* appears.

Interestingly, two new populations were found in the summer of 2014 in other localities at the *Sistema Ibérico* (Fig 1). One of these recently discovered populations (hereafter called ‘*Maranchón* population’) is located barely 16 km east of the *Anguita* population in a similar temporary pond (Julián García-Muñoz, *pers. com.*). The second one (hereafter called ‘*Zaida* population’) is in Zaragoza, c 100 km east of *Anguita* and *Maranchón* populations, where it occupies the temporary flooded shoulders of a farming path [18].

Mediterranean temporary ponds, like the ones where *C. navasii* occurs, are shallow water-holes flooded in winter and dry out by the beginning of summer. These ponds occur on superficial depressions over impermeable grounds. The degree of substrate impermeability and depression slope are key factors that control water level variability at a local scale [19]. However, rainfall is also a critical factor that determines flooding duration as well as size, depth and shape of ponds [19]. Every year, the hemicyptophyte *C. navasii* (S1 Fig) produces new above-ground shoots, leaves and flowers in the first line of vegetation as water drains. Its seeds fall by barochory after which an eventual secondary dispersal mechanism may happen by epizoochory. Fallen seeds are mixed into the mud and may get stuck to animals’ paws as they approach the pond to drink water [5]. The ponds where *C. navasii* grows have been traditionally used as natural watering holes for livestock supply (Fig 2) due to the impermeability of the clays [20, 21]. Because of this, shepherds may have probably favored these ponds to provide water for their flock during the long and dry summer. Given the recent discovery of the three distant

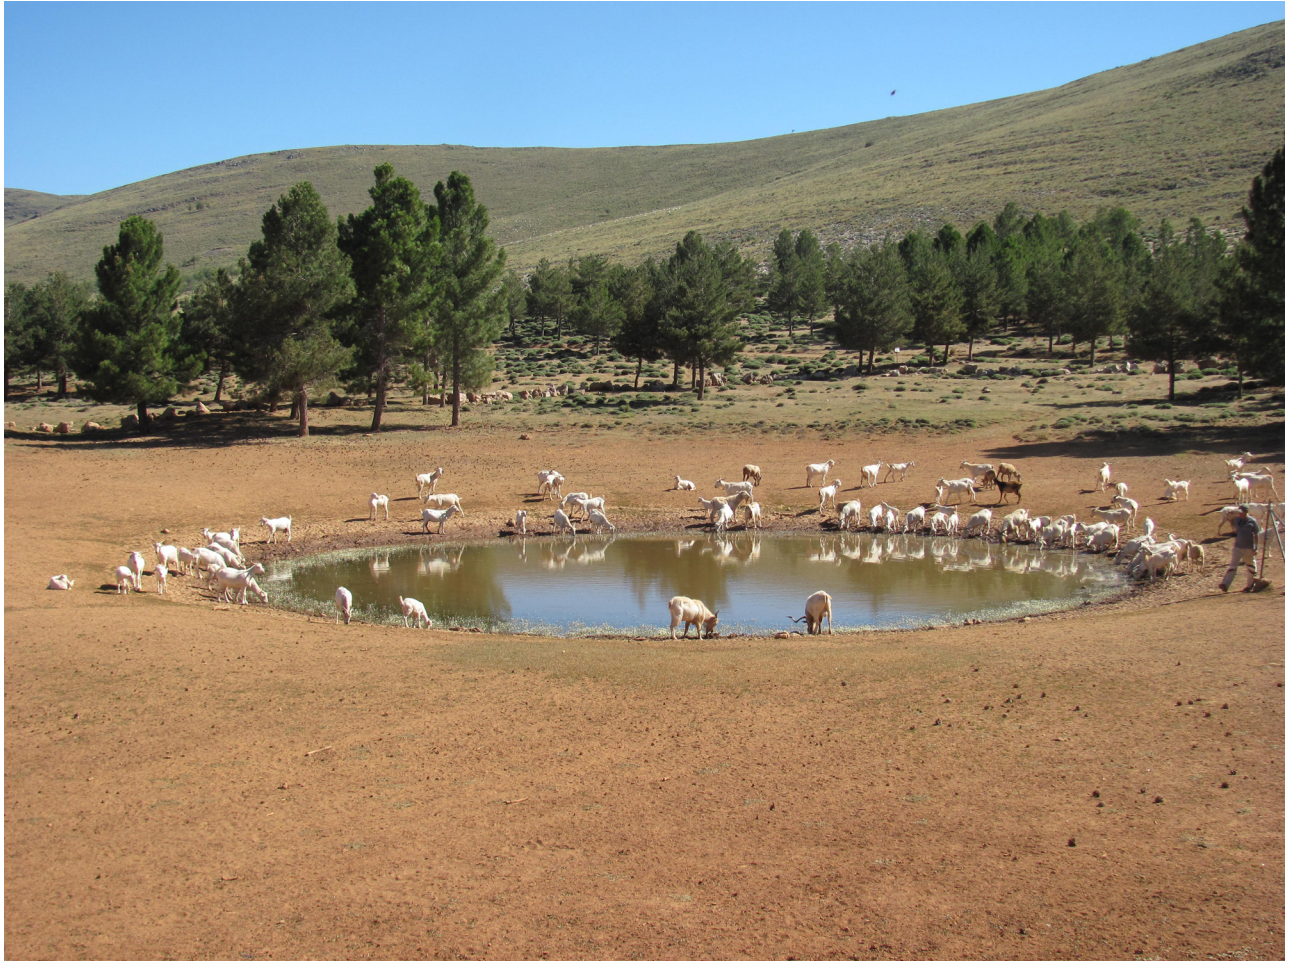

**Fig 2. Natural habitat of *Coronopus navasii* (Temporary Mediterranean pond).** Sabinar pond (Sierra de Gádor).

doi:10.1371/journal.pone.0159484.g002

northern populations in otherwise highly accessible localities related to traditional pastoral uses, coupled with their reduced population sizes, we could not help but wonder if the origin of these populations was human-mediated. This hypothesis is plausible since ‘transhumance’ has been a traditional land use in Spain until recent years [22]. This practice consisted in the regular displacement of cattle by shepherds to take advantage of spatial-temporal variations in land productivity associated to seasonal climates such as the Mediterranean one. Transhumance has a long history in the Iberian Peninsula, with some traces in pre-Roman times and its peak during the Middle Ages, when over 3 million *merino* sheep moved through the country going over up to 800 km distance [23]. The role of transhumance on plant dispersal has been experimentally evaluated revealing that seeds can be transported several hundreds of kilometers attached to hooves of transhumant sheep, even in plants with no adaptation to epizoochory such as *Plantago lagopus* L. [24]. For the particular case of *C. navasii*, transhumance-migration seems likely given that: (1) its individuals germinate in the first line of vegetation as water drains, (2) fruits phenology coincide with domesticated ungulates’ summer migrations and (3) ponds are used for flock drinking.

Despite *C. navasii* is one of the best documented cases of the Spanish endangered flora and one of the few with an integral conservation program already implemented, the recent finding of three distant populations changes the biogeographic scenario of the species questioning its

conservation status and the efficiency of the on-going conservation program. Disclosing the evolutionary history that lead to *C. navasii* disjunction is essential to reassess the conservation status of the species and redefine its conservation strategy. In this study, we analyze DNA sequences and environmental data to evaluate whether the origin of the current disjunction of *C. navasii* was human-mediated ('transhumance hypothesis') or not. Ultimately, we seek to know if the occurrence of the species in Central East Spain is adventitious or the result of an old disjunction in order to reformulate the on-going species conservation plan to accommodate the new biogeographic scenario. To address these goals, we analyzed haplotype variation from six DNA regions in seven populations representing the two main disjunct areas of *C. navasii* (four populations from *Sierra de Gádor*, three populations from *Sistema Ibérico*). Additional datasets were obtained from previous studies (Malvidae, [25]; *Lepidium*, [26]) to provide a phylogenetic framework to estimate the divergence age for the origin of *C. navasii* and its disjunction. Finally, species distribution models were generated for past, present and future under different climate change scenarios. The specific goals were to: (1) test the monophyly of *C. navasii*, (2) explore the geographic structure of its haplotype variation, (3) disclose the temporal scenario for the origin of *C. navasii* and its disjunction, (4) describe an edaphic-climate niche modeling for the species at present time and evaluate niche performances under past and future climate scenarios, (5) propose conservation actions on the *Sistema Ibérico* populations and provide basic information to reevaluate the conservation status of the species.

## Materials and Methods

### Ethics statement

*Coronopus navasii* is an endangered species and no individual was collected. For this study, the minimum number of leaves was collected without compromising the survival of living plants. The environmental authorities of Andalusia, region where the species is protected under a recovery plan, granted the required permits for this study. Regional authorities from Aragón and Castilla-La Mancha are knowledgeable about this research and gave their formal approval to the collection of plant material in their respective areas of competence. This study did not require ethical approval.

### Study case

*Coronopus navasii* has between 8 and 10 local populations in *Sierra de Gádor* (Andalusia, Southeast Spain), occurring above 1,600 m.a.s.l. (Fig 1) and organized in a metapopulation dynamics [5]. Two local populations display a relatively large and constant population size: (1) *Cortijo de Caparidán* pond with around 37,000 individuals, and (2) *Sabinar* pond with nearly 1,200 individuals [5]. The remaining 6–8 local populations include fewer than 20 individuals each and are affected by inter-annual demographic fluctuations [5]. The *Sierra de Gádor* metapopulation is protected through: (1) its habitat since this mountain range is catalogued as a Site of Community Importance in the European Natura 2000 network (European code: ES6110008), (2) the conservation program of the species already in progress, and (3) a set of *in situ* conservation actions recently considered within the Recovery Plan for 'Andalusian High Summit Species' [27]. The three populations found in the surroundings of the *Sistema Ibérico* (Central East Spain) occur from 1,000 to 1,200 m.a.s.l. (Fig 1). Although, these altitudes cannot be considered high, the climatic conditions are extreme and subject to high seasonal fluctuation since this geographic area is a continental plateau considered a cold inland island in the Iberian Peninsula. The *Anguita* and *Maranchón* populations (Guadalajara; Fig 1) inhabit similar pond habitats as the ones described in the *Sierra de Gádor* metapopulation [16], whereas the *Zaida*

population (Zaragoza; Fig 1) inhabits temporarily flooded sides of a country road that crosses a large and semi-permanent pond [18]. Three censuses have been performed in the *Anguita* population revealing a rather variable size ranging between < 100 reproductive individuals [16] and 800 [28]. Because of the recent discovery of the other two populations, only the respective initial censuses are available consisting in 450 reproductive individuals at *Maranchón* and 1,536 at *Zaida* [18]. In terms of management, the *Anguita* and *Maranchón* populations are protected through their habitat since they are located within a Site of Community Importance in the European Natura 2000 network (European code ES4240017). The *Zaida* population lacks any legal protection, although this locality is part of a Special Conservation Area under the EU Birds Directive (European code ES0000017).

## Molecular study

**Field and lab work strategy.** Fifty-four individuals from seven populations of *C. navasii* were sampled from the two disjunct areas where the species occurs (Fig 1, Table 1): 24 individuals from four local populations from *Sierra de Gádor* (Southeast Spain) and 30 from three populations of the continental plateaus of *Sistema Ibérico* (Central East Spain). The number of individuals per local population was ten except for two *Sierra de Gádor* locations (*Mercurio* and *Balsilla Alta*) where the population size was limited to two (Table 1). Leaf material was immediately stored in silica gel.

Total genomic DNA was isolated from leaf tissue using the extraction protocol DNAeasy Plant Mini Kiy (Qiagen, California, USA). Five plastid DNA regions as well as the nuclear ITS spacer were sequenced for all the 54 individuals of *C. navasii*, except for *trnS-trnG* and *trnT-trnL* from which only 51 and 50 individuals could be sequenced, respectively (Table 1). The forward and reverse primers used for the amplification of each of the six DNA regions as well as their respective PCR conditions were taken from the following studies: *psbA* and *trnH* [29] for *trnH-psbA*, *trnS* and *trnG* [30] for *trnS-trnG*, *trne* and *trnf* [31] for *trnL-trnF*, *trna* and *trnb* [31] for *trnT-trnL*, *trnQ* and *rps16x1* [32] for *rps16-trnQ*, and 17SE and 26SE for the *nrDNA* ITS [33]. Amplifications were done in a MyClycer thermal cycler. PCR products successfully amplified were sequenced using the STABvida sequencing service (Big Dye Terminator v. 2.0, Applied Biosystem) and Secugen SL (Madrid, Spain). Sequences were edited using *Geneious R8* [34]. All the DNA matrices were aligned using the windows interface MUSCLE [35] followed by further visual adjustments.

A comprehensive taxonomic sampling above the species-level was compiled to provide a robust phylogenetic framework to recover accurate estimates on divergence ages. Two datasets (nuclear ITS, plastid *trnT-trnL*) including 97 samples of *Lepidium s.l.* (*Cardaria*, *Coronopus*, *Lepidium*, *Stroganowia*, *Stubendorffia*, *Winklera*) plus *Hornungia petraea* as outgroup were provided by Klaus Mummenhoff based on Mummenhoff *et al.* 2009 (S1 Table) [26]. Four of the individuals of *C. navasii* from Southeast and Central East disjunct areas herein sequenced were added to both datasets. Each of the resulting two DNA matrices included 102 sequences (hereafter called '*Lepidium* nuclear matrix' and '*Lepidium* plastid matrix').

No feasible fossil record attributable to *Lepidium s.l.* is available. Consequently, a secondary calibration approach was needed in order to obtain calibration points to estimate the divergence age of *C. navasii* and its disjunction. To this purpose, 60 Brassicales and twelve Malvales sequences of the plastid *matK* gene were obtained from a previous study [25], as well as one from Crossosomatales and one from Huertales. All these 74 sequences were downloaded from the GenBank database (<http://www.ncbi.nlm.nih.gov/genbank/>). Since only one *Lepidium* sample was included in Hernández-Hernández *et al.* (2013) [25], five additional *Lepidium* species and one sample of *Coronopus squamatus* (Forssk.) Asch. were also taken from previous studies

**Table 1. List of studied material of *Coronopus navasii* used for the phylogenetic-based analyses, phylogeography and the niche modelling studies.**

| Individual number                                                                                                             | Altitude | UTM       | GenBank accession numbers |                  |                  |                  |                   |          | Plastid Hp |
|-------------------------------------------------------------------------------------------------------------------------------|----------|-----------|---------------------------|------------------|------------------|------------------|-------------------|----------|------------|
|                                                                                                                               |          |           | <i>trnH-psbA</i>          | <i>trnS-trnG</i> | <i>trnL-trnF</i> | <i>trnT-trnL</i> | <i>rps16-trnQ</i> | ITS      |            |
| <b>SIERRA DE GÁDOR (ALMERÍA, SOUTHEAST SPAIN)</b>                                                                             |          |           |                           |                  |                  |                  |                   |          |            |
| <b>Sabinar</b> (E. Salmerón-Sánchez, F. Martínez-Hernández, F.J. Pérez-García and J.F. Mota-Poveda, 11-VII-2011)              |          |           |                           |                  |                  |                  |                   |          |            |
| Individual 1                                                                                                                  | 1835     | 30SWF1282 | KM201532                  | KM201488         | KM201483         | KM201494         | KM201513          | KM201465 | GAD        |
| Individual 2                                                                                                                  | 1835     | 30SWF1282 | KM201533                  | KM201489         | KU213763         | KM201495         | KM201514          | KM201466 | GAD        |
| Individual 3                                                                                                                  | 1835     | 30SWF1282 | KU213670                  | KU213718         | KU213764         | KM201496         | KM201515          | KM201467 | GAD        |
| Individual 4                                                                                                                  | 1835     | 30SWF1282 | KU213671                  | KU213719         | KU213765         | KM201497         | KM201516          | KM201468 | GAD        |
| Individual 5                                                                                                                  | 1835     | 30SWF1282 | KU213672                  | KU213720         | KU213766         | KM201498         | KM201517          | KM201469 | GAD        |
| Individual 6                                                                                                                  | 1835     | 30SWF1282 | KU213673                  | KU213721         | KU213767         | KU213812         | KU213843          | KU213878 | GAD        |
| Individual 7                                                                                                                  | 1835     | 30SWF1282 | KU213674                  | KU213722         | KU213768         | KU213813         | KU213844          | KU213879 | GAD        |
| Individual 8                                                                                                                  | 1835     | 30SWF1282 | KU213675                  | KU213723         | KU213769         | KU213814         | KU213845          | KU213880 | SAB8       |
| Individual 9                                                                                                                  | 1835     | 30SWF1282 | KU213676                  | KU213724         | KU213770         | KU213815         | KU213846          | KU213881 | GAD        |
| Individual 10                                                                                                                 | 1835     | 30SWF1282 | KU213677                  | KU213725         | KU213771         | KU213816         | KU213847          | KU213882 | GAD        |
| <b>Cortijo de Caparidán</b> (E. Salmerón-Sánchez, F. Martínez-Hernández, F.J. Pérez-García and J.F. Mota-Poveda, 11-VII-2011) |          |           |                           |                  |                  |                  |                   |          |            |
| Individual 1                                                                                                                  | 1600     | 30SWF0887 | KM201534                  | KM201490         | KM201484         | KM201499         | KM201518          | KM201470 | GAD        |
| Individual 2                                                                                                                  | 1600     | 30SWF0887 | KM201535                  | KM201491         | KU213772         | KM201500         | KM201519          | KM201471 | CAP2       |
| Individual 3                                                                                                                  | 1600     | 30SWF0887 | KU213678                  | KU213726         | KU213773         | KM201501         | KM201520          | KM201472 | GAD        |
| Individual 4                                                                                                                  | 1600     | 30SWF0887 | KU213679                  | KU213727         | KU213774         | KM201502         | KM201521          | KM201473 | GAD        |
| Individual 5                                                                                                                  | 1600     | 30SWF0887 | KU213680                  | KU213728         | KU213775         | KM201503         | KM201522          | KM201474 | GAD        |
| Individual 6                                                                                                                  | 1600     | 30SWF0887 | KU213681                  | KU213729         | KU213776         | KU213817         | KU213848          | KU213883 | GAD        |
| Individual 7                                                                                                                  | 1600     | 30SWF0887 | KU213682                  | KU213730         | KU213777         | KU213818         | KU213849          | KU213884 | GAD        |
| Individual 8                                                                                                                  | 1600     | 30SWF0887 | KU213683                  | KU213731         | KU213778         | KU213819         | KU213850          | KU213885 | GAD        |
| Individual 9                                                                                                                  | 1600     | 30SWF0887 | KU213684                  | KU213732         | KU213779         | KU213820         | KU213851          | KU213886 | GAD        |
| Individual 10                                                                                                                 | 1600     | 30SWF0887 | KU213685                  | KU213733         | KU213780         | —                | KU213852          | KU213887 | —          |
| <b>Barranco del Mercurio</b> (J.C. Moreno-Saiz, F. Martínez-Hernández and S. Martín-Hernanz, 12-VI-2012)                      |          |           |                           |                  |                  |                  |                   |          |            |
| Individual 1                                                                                                                  | 1720     | 30SWF1481 | KU213688                  | —                | KU213782         | KM201504         | KM201523          | KM201475 | MER1       |
| Individual 2                                                                                                                  | 1720     | 30SWF1481 | KU213689                  | —                | KM201485         | KM201505         | KM201524          | KM201476 | GAD        |
| <b>Balsilla Alta</b> (F.J. Pérez-García and J.F. Mota-Poveda, 21-VI-2012)                                                     |          |           |                           |                  |                  |                  |                   |          |            |
| Individual 1                                                                                                                  | 2150     | 30SWF1484 | KU213686                  | —                | KU213781         | KM201506         | KM201525          | KU213888 | GAD        |
| Individual 2                                                                                                                  | 2150     | 30SWF1484 | KU213687                  | KU213734         | KM201486         | KM201507         | KM201526          | KM201477 | BAI2       |
| <b>SISTEMA IBÉRICO (GUADALAJARA, ZARAGOZA, CENTRAL EAST SPAIN)</b>                                                            |          |           |                           |                  |                  |                  |                   |          |            |
| <b>Anguita</b> (J.C. Moreno-Saiz and R. López-Huerta, 26-VI-2011)                                                             |          |           |                           |                  |                  |                  |                   |          |            |
| Individual 1                                                                                                                  | 1250     | 30TWL54   | KM201536                  | KM201492         | KM201487         | KM201508         | KM201527          | KM201478 | IBE        |
| Individual 2                                                                                                                  | 1250     | 30TWL54   | KM201537                  | KM201493         | KU213783         | KM201509         | KM201528          | KM201479 | IBE        |
| Individual 3                                                                                                                  | 1250     | 30TWL54   | KU213690                  | KU213735         | KU213784         | KM201510         | KM201529          | KM201480 | IBE        |
| Individual 4                                                                                                                  | 1250     | 30TWL54   | KU213691                  | KU213736         | KU213785         | KM201511         | KM201530          | KM201481 | IBE        |
| Individual 5                                                                                                                  | 1250     | 30TWL54   | KU213692                  | KU213737         | KU213786         | KM201512         | KM201521          | KM201482 | IBE        |
| Individual 6                                                                                                                  | 1250     | 30TWL54   | KU213693                  | KU213738         | KU213787         | —                | KU213853          | KU213889 | —          |
| Individual 7                                                                                                                  | 1250     | 30TWL54   | KU213694                  | KU213739         | KU213788         | —                | KU213854          | KU213890 | —          |
| Individual 8                                                                                                                  | 1250     | 30TWL54   | KU213695                  | KU213740         | KU213789         | KU213821         | KU213855          | KU213891 | IBE        |
| Individual 9                                                                                                                  | 1250     | 30TWL54   | KU213696                  | KU213741         | KU213790         | KU213822         | KU213856          | KU213892 | ANG9       |
| Individual 10                                                                                                                 | 1250     | 30TWL54   | KU213697                  | KU213742         | KU213791         | KU213823         | KU213857          | KU213893 | IBE        |
| <b>Maranchón</b> (S. Martín-Hernanz, V. Valcárcel, J. García and J.C. Moreno-Saiz, 25-VII-2014)                               |          |           |                           |                  |                  |                  |                   |          |            |
| Individual 1                                                                                                                  | 1200     | 30TWL64   | KU213698                  | KU213743         | KU213792         | KU213824         | KU213858          | KU213894 | IBE        |
| Individual 2                                                                                                                  | 1200     | 30TWL64   | KU213699                  | KU213744         | KU213793         | KU213825         | KU213859          | KU213895 | IBE        |
| Individual 3                                                                                                                  | 1200     | 30TWL64   | KU213700                  | KU213745         | KU213794         | KU213826         | KU213860          | KU213896 | IBE        |

(Continued)

Table 1. (Continued)

| Individual number                                                          | Altitude | UTM     | GenBank accession numbers |                  |                  |                  |                   |          | Plastid Hp |
|----------------------------------------------------------------------------|----------|---------|---------------------------|------------------|------------------|------------------|-------------------|----------|------------|
|                                                                            |          |         | <i>trnH-psbA</i>          | <i>trnS-trnG</i> | <i>trnL-trnF</i> | <i>trnT-trnL</i> | <i>rps16-trnQ</i> | ITS      |            |
| Individual 4                                                               | 1200     | 30TWL64 | KU213701                  | KU213746         | KU213795         | KU213827         | KU213861          | KU213897 | IBE        |
| Individual 5                                                               | 1200     | 30TWL64 | KU213702                  | KU213747         | KU213796         | KU213828         | KU213862          | KU213898 | IBE        |
| Individual 6                                                               | 1200     | 30TWL64 | KU213703                  | KU213748         | KU213797         | KU213829         | KU213863          | KU213899 | IBE        |
| Individual 7                                                               | 1200     | 30TWL64 | KU213704                  | KU213749         | KU213798         | —                | KU213864          | KU213900 | —          |
| Individual 8                                                               | 1200     | 30TWL64 | KU213705                  | KU213750         | KU213799         | KU213830         | KU213865          | KU213901 | IBE        |
| Individual 9                                                               | 1200     | 30TWL64 | KU213706                  | KU213751         | KU213800         | KU213831         | KU213866          | KU213902 | IBE        |
| Individual 10                                                              | 1200     | 30TWL64 | KU213707                  | KU213752         | KU213801         | KU213832         | KU213867          | KU213903 | IBE        |
| <b>Zaida</b> (V. Valcárcel, Á. Baltanás, and J.C. Moreno-Saiz, 22-IV-2015) |          |         |                           |                  |                  |                  |                   |          |            |
| Individual 1                                                               | 1050     | 30TXL14 | KU213708                  | KU213753         | KU213802         | KU213833         | KU213868          | KU213904 | ZAI1       |
| Individual 2                                                               | 1050     | 30TXL14 | KU213709                  | KU213754         | KU213803         | KU213834         | KU213869          | KU213905 | ZAI1       |
| Individual 3                                                               | 1050     | 30TXL14 | KU213710                  | KU213755         | KU213804         | KU213835         | KU213870          | KU213906 | IBE        |
| Individual 4                                                               | 1050     | 30TXL14 | KU213711                  | KU213756         | KU213805         | KU213836         | KU213871          | KU213907 | ZAI4       |
| Individual 5                                                               | 1050     | 30TXL14 | KU213712                  | KU213757         | KU213806         | KU213837         | KU213872          | KU213908 | IBE        |
| Individual 6                                                               | 1050     | 30TXL14 | KU213713                  | KU213758         | KU213807         | KU213838         | KU213873          | KU213909 | ZAI1       |
| Individual 7                                                               | 1050     | 30TXL14 | KU213714                  | KU213759         | KU213808         | KU213839         | KU213874          | KU213910 | ZAI4       |
| Individual 8                                                               | 1050     | 30TXL14 | KU213715                  | KU213760         | KU213809         | KU213840         | KU213875          | KU213911 | IBE        |
| Individual 9                                                               | 1050     | 30TXL14 | KU213716                  | KU213761         | KU213810         | KU213841         | KU213876          | KU213912 | IBE        |
| Individual 10                                                              | 1050     | 30TXL14 | KU213717                  | KU213762         | KU213811         | KU213842         | KU213877          | KU213913 | ZAI4       |

Locality is provided indicating altitude, MGRS coordinates and voucher information. GenBank accession numbers are given for each of the DNA regions analyzed in each of the individuals. DNA haplotypes recovered with *trnH-psbA*, *rps16-trnQ* and *trnT-trnL* plastid regions are specified.

doi:10.1371/journal.pone.0159484.t001

[36, 37, 38, 39], downloaded from GenBank and added to this dataset. As a result, a matrix including 79 *matK* Malvidae sequences was built, using *Gerrardina* and *Tapiscia* as outgroup (hereafter called ‘Malvidae matrix’; S2 Table).

A haplotype-based phylogeographic study was conducted on the study species and its sister-group. Four plastid DNA regions (*trnT-trnL*, *trnL-trnF*, *rps16-trnQ* and *trnH-psbA*) were finally included in these analyses since the other two did not reveal any mutation (Table 1). To cover the sister-group in the phylogeographic approach, sequences of two plastid DNA regions (*trnT-trnL*, *trnL-trnF*) representing the two species of the sister-group of *C. navasii* (*C. squamatus* and *C. violaceus* (Munby) Kuntze, [26]) were taken from a previous study and downloaded from GenBank (S1 Table). As a result, two plastid DNA matrices were compiled. Firstly, the hereafter called ‘Mediterranean *Coronopus* clade matrix’ that included two plastid DNA regions (*trnL-trnF* and *trnT-trnL*) and 52 individuals: 50 of *C. navasii*, one of *C. squamatus*, and one of *C. violaceus* (Table 1 and S1 Table). Secondly, the hereafter called ‘*C. navasii* matrix’, which included three plastid DNA regions (*rps16-trnQ*, *trnT-trnL* and *trnH-psbA*) and 50 individuals of *C. navasii* (Table 1).

**Divergence age estimates and phylogeographic analyses.** Divergence age estimates were done as implemented in BEAST v.1.8.2 [40]. The simplest models of sequence evolution used (ITS1: K80+G, ITS2: K80+G, *trnT-trnL*: GTR+G) were selected as the best fitting models based on the Corrected Akaike Information Criterion (AICc) implemented in jModelTest 1.1b [41].

The molecular dating was performed in a two-step procedure due to the secondary calibration approach implemented (see above). The first step was conducted from the Malvidae matrix. Four fossil calibration points were selected for this first step based on a previous study ([25]; S2 Fig): (N1) a maximum bound age of 90.4 million years (Myr) and a minimum age of



88.5 Myr were applied to the divergence between *Luehea* clade and *Bixa* clade based on a fossil of *Dressiantha bicarpellata* [42], (N2) a maximum bound age of 61.9 Myr and a minimum age of 61.5 Myr were applied to the divergence between *Bretschneidera* and *Tropaeolum* based on a fossil of *Akania* sp. [43], (N3) a maximum bound age of 30.8 Myr and a minimum age of 29.2 Myr were applied to the divergence between *Thlaspi* and *Alliaria* based on a fossil of *Thlaspi primaevum* [43, 44], and (N4) 17 Myr and 16.3 Myr were applied as maximum and minimum bound ages to the divergence between *Capparis* and *Apophyllum*, based on a fossil of *Capparidoxylon holleisii* [43, 45]. Cross-validation [46] was conducted to check for congruence between the four fossils selected. Variation in the sum of the squared differences (SS) of the age recovered in the molecular estimate for a given node and its respective fossil age was computed when comparing the molecular estimates obtained using each of the four fossils as a single calibration point (S3 Fig). *Capparidoxylon* is the fossil with the greatest SS value, i.e. the one that provides the biggest deviation between molecular estimates and fossil ages, followed by *Thlaspi* (S3 Fig). However, removal of the most deviant fossil (*Capparidoxylon*) did not result in a significant difference in the variance ( $F = 2.09$ , d.f. = 11,  $P = 0.4$ ). Therefore, the four fossils were used for this first step of the molecular dating. In the second step, three well-supported nodes recovered in the Malvaceae chronogram (S2 Fig) were selected as secondary calibration points to reconstruct divergence age estimates within *Lepidium* s.l. Normal prior distributions were used to calibrate the divergence between the following nodes (S4 Fig): (N1) *Lepidium pedicellatum* clade and the remaining *Lepidium* s.l. ( $19.5 \pm 3.0$  Myr), (N2) *L. perfoliatum* and the *L. rigidum*—*L. campestre* clade with ( $12.35 \pm 2.5$  Myr), and (N3) *L. campestre* subclade and *L. hirtum* subclade (mean =  $8.7 \pm 1.5$  Myr). For the plastid analysis, the Mediterranean *Coronopus* clade was constrained. Uncorrelated lognormal model distribution and the best fitting models selected by jModeltest were used. One hundred million generations were run, sampling every 10,000<sup>th</sup> tree. Burn-in was determined based on the Likelihood convergence screened with Tracer 1.4. [47]. Trees retrieved before reaching convergence were accordingly discarded. Tree topologies obtained from the BEAST analyses of *Lepidium* nuclear and plastid matrices were compared by the Approximately Unbiased (AU) test [48], as implemented in Treefinder [49].  $10^5$  replicates were performed and hypothesis rejection was set at a 0.05 threshold. Bayes Factors (BF; [50, 51]) were also estimated by using the stepping-stone sampling implemented in BEAST to provide additional test topology. The BF analysis allows comparing the strength of evidence between a reference model (H0) and an alternative model (Hi) given the data. The stepping-stone method provides more accurate marginal likelihood estimates than the harmonic mean method [52, 53]. Selection of the best competing hypotheses against the H0 is based on the log BF ( $LBF = 2\log_e(BF)$ ) and according to Kass and Raftery's interpretation (Positive evidence,  $2\log_e(BF) = 2-6$ ; Strong evidence,  $2\log_e(BF) = 6-10$ ; Very Strong evidence,  $2\log_e(BF) > 10$  [50]). Positive values of the LBF indicate preference for H1, while negative values favor the H0.

Plastid haplotype networks were obtained using Statistical Parsimony [54] as implemented in TCS 1.21 [55] both for Mediterranean *Coronopus* clade and *C. navasii* matrices. The maximum number of differences among haplotypes, as a result of single substitutions, was calculated with 95% confidence limits. Gaps were treated as missing data for the analysis of the *Coronopus* clade matrix to preserve the connection of the outgroup network to the one of *C. navasii*, whereas missing data were treated as the fifth character for the *C. navasii* matrix to include indel information in the detection of haplotypes.

**Gene flow and genetic differentiation estimates.** Two analyses were conducted to account for the current gene flow and migration rates between the Southeast and Central East groups of populations. Firstly, an analysis of molecular variance (AMOVA) was performed with software Arlequin 3.0 [56]. Secondly, software dnaSP was used to obtain both genetic

differentiation estimators (FST and GST) and the number of migrants (Nm) estimated with Hudson et al. method [57].

### Species distribution modeling

**Calibration and validation datasets.** A dataset composed by the sampled populations spanned to 14 presences at 1 km<sup>2</sup> grid resolution. A dataset of 1,000 pseudo absence points was randomly generated, preventing them to fall within 1 km of *C. navasii* occurrence cells. These set of presence and pseudo absence points were used to calibrate the models.

**Predictor variables.** Bioclimatic variables for current conditions were obtained from Worldclim project [58] at 30 seconds resolutions. The eight *a priori*, most meaningful species distribution models (SDMs) were selected from the 19 bioclimatic variables available (Table 2). Two topographic predictors were incorporated: Slope was derived in ArcGIS 9.3 [59] from a high resolution DEM (20 meters) available from the National Geographic Center and rescaled to match climate layers resolution. Topographic index was developed with ArcInfo routines available at Nicklaus Zimmerman website (<http://bit.ly/1nSEhoO>). The novel climate scenarios available in the Worldclim project [58] downscaled from the recent 5<sup>th</sup> report of IPCC [60] were used to project calibrated models for years 2050 and 2070. HadGEM2-ES was the Global Circulation Model selected, as it accounted for the whole range of Representative Concentration Pathways (RCP) of greenhouse gases concentrations considered by the IPCC. Among them, we selected 2.6, 6.0 and 8.5 RCPs. For past climatic conditions, bioclimatic variables for the Last Interglacial period (LIG, 120–140 kilo years (ky)) and CCSM model for Last Glacial Maximum (LGM, 21 ky) were used from Worldclim.

**Model workflow.** Niche model analysis was conducted with Biomod2 package [61] implemented in R software [62]. The chosen models were stepwise generalized linear models (GLM), boosted regression trees (GBM), classification tree analysis (CTA), artificial neural network (ANN), multiple adaptive regression splines (MARS) and random forests (RF). The ensemble modeling technique implemented in Biomod2 was utilized to build a single prediction. Because of the limited presence data available, the procedure was repeated 100 times splitting data into 20% and 80% for evaluation and calibration, respectively. One hundred absences were randomly selected from the total pool for each run and weighted to match the number of presences. One hundred permutations were run for each model to assess variable importance

**Table 2. Contribution to variance of each selected variable for each model and hierarchical partitioning approach.**

| Variable description                                                                              | ENSEMBLE | GLM   | GBM   | CTA   | ANN   | MARS  | RF    | HP    |
|---------------------------------------------------------------------------------------------------|----------|-------|-------|-------|-------|-------|-------|-------|
| Annual Mean Temperature                                                                           | 0.607    | 0.913 | 0.307 | 0.211 | 0.274 | 0.918 | 0.139 | 22.45 |
| Temperature Seasonality                                                                           | 0.097    | 0     | 0.297 | 0     | 0.185 | 0.00  | 0.287 | 14.84 |
| Mean Temperature of Wettest Quarter                                                               | 0.007    | 0     | 0.085 | 0.783 | 0.002 | 0.01  | 0.186 | 12.48 |
| Mean Temperature of Driest Quarter                                                                | 0.026    | 0.56  | 0.008 | 0     | 0     | 0.00  | 0.002 | 0.28  |
| Annual Precipitation                                                                              | 0.044    | 0     | 0.129 | 0     | 0.081 | 0.120 | 0.056 | 6.40  |
| Precipitation of Wettest Month                                                                    | 0.049    | 0     | 0     | 0     | 0     | 0.361 | 0.128 | 22.40 |
| Precipitation of Wettest Quarter                                                                  | 0.018    | 0     | 0.006 | 0     | 0     | 0.42  | 0.027 | 4.57  |
| Precipitation of Driest Quarter                                                                   | 0.048    | 0     | 0.001 | 0     | 0     | 0.116 | 0.001 | 6.19  |
| Slope: Maximum rate of change in height value from each map cell to its neighbors                 | 0.050    | 0     | 0.005 | 0     | 0.274 | 0.121 | 0     | 6.21  |
| TPI: Topographic exposure at various spatial scales, hierarchically integrated into a single grid | 0.00     | 0.483 | 0.041 | 0     | 0     | 0     | 0     | 4.21  |

Variables description and abbreviation are provided. Models are abbreviated as follows: Generalized linear model (GLM), boosted regression trees (GBM), classification tree analysis (CTA), artificial neural network (ANN), multiple adaptive regression splines (MARS), random forest (RF) and hierarchical partitioning (HP).

doi:10.1371/journal.pone.0159484.t002

as implemented in Biomod2. A final ensemble model was built with all the runs with AUC > 0.7. Output suitability maps were crossed with a soil layer of Iberian Peninsula in order to account only for areas where clay soils were present. Complementarily, hierarchical partitioning approach [63] was conducted with the hier.part package [64] in R software to account for a linear method based on Ordinary Least Squares. In order to assess the changes in range sizes (i.e., changes in total potential distribution area), the presence-absence distribution maps were calculated from suitability maps from the threshold that maximized the AUC score. Changes in range sizes were calculated as the percentage of lost or gained cells with respect to present period.

For past climate conditions, pure climate suitability models were calibrated under present climate conditions and projected into the past climatic scenarios, as no topographic information for the past is available. For the same reason, output maps were not crossed with clay soil layers.

## Results

### Molecular study

**Divergence age estimates.** The Malvidae matrix is 1,667 pair of bases (bp) length with a total of 1,106 variable characters of which 751 are potentially parsimony-informative. The *Lepidium* nuclear matrix is 493 bp length with a total of 300 variable characters of which 184 are potentially parsimony-informative. The *Lepidium* plastid matrix is 668 bp length with a total of 203 variable characters of which 66 are potentially parsimony-informative. The topology of the BEAST chronogram resulting from the Malvidae matrix (S2 Fig) is mostly congruent with the one obtained by Hernández-Hernández et al. (2013) [25] except for between-genera relationships within the *Bixa* clade (S2 Fig). The age inferred for the three nodes selected as calibration points for the second step are as follow (S2 Fig): (N1) 27.74 Mya—12.72 Mya for the early divergence of *Lepidium*, (N2) 19.42 Mya—6.36 Mya for the divergence between *L. perfoliatum* and *Cardaria draba* clade, and (N3) 15.12 Mya—3.79 Mya between *Cardaria draba* and *L. campestre*.

The topology of the MCC tree obtained from the BEAST analysis of the *Lepidium* nuclear matrix is mostly congruent with previous results based on ITS DNA region [26] displaying identical or higher clade supports (S4A Fig). The MCC tree obtained from the analysis of the *Lepidium* plastid matrix displays a large basal polytomy with few well-supported lineages (S4B Fig). Despite the low resolution of the plastid phylogeny, two incongruences were visually detected when compared to the nuclear phylogeny (S4A vs. S4B Fig). In fact, results from the AU and BF tests reveal significant incongruence between the nuclear and plastid trees topologies (S3 Table), preventing us from conducting a concatenated analysis. Therefore, the results will be discussed independently. *Coronopus navasii* constitutes a well-supported monophyletic species in the MCC tree obtained from *Lepidium* nuclear matrix (1.00 Posterior Probability, PP; Fig 3A and S4A Fig) sister to *C. squamatus* and *C. violaceus* (hereafter called 'Mediterranean *Coronopus* clade'; 1.00 PP; Fig 3A and S4A Fig), as already reported by Mummenhoff et al. (2009) [26]. The MCC tree (S4A Fig) recovers 3.11 Mya (95% High Posterior Density Confidence Interval (95% CI): 5.23–1.42 Mya, Fig 3A and S4A Fig) for the early divergence of the Mediterranean *Coronopus* clade. The crown age recovered for *C. navasii* is 0.50 Mya (95% CI: 1.45–0.03 Mya; Fig 3A and S4A Fig). The MCC tree obtained from *Lepidium* plastid matrix (S4B Fig) recovers 5.61 Mya (95% CI): 9.10–1.60 Mya, Fig 3A and S4B Fig) for early divergence of the Mediterranean *Coronopus* clade. The divergence between the *Sierra de Gádor* and *Sistema Ibérico* disjunct areas is 3.74 for Mya (95% CI: 6.30–0.49 Mya; Fig 3A and S4B Fig).

**Genetic variability of *C. navasii*.** No sequence variation was detected among all individuals of *C. navasii* for the two plastid regions *trnS-trnG* and *trnL-trnF* and the nuclear ITS. The

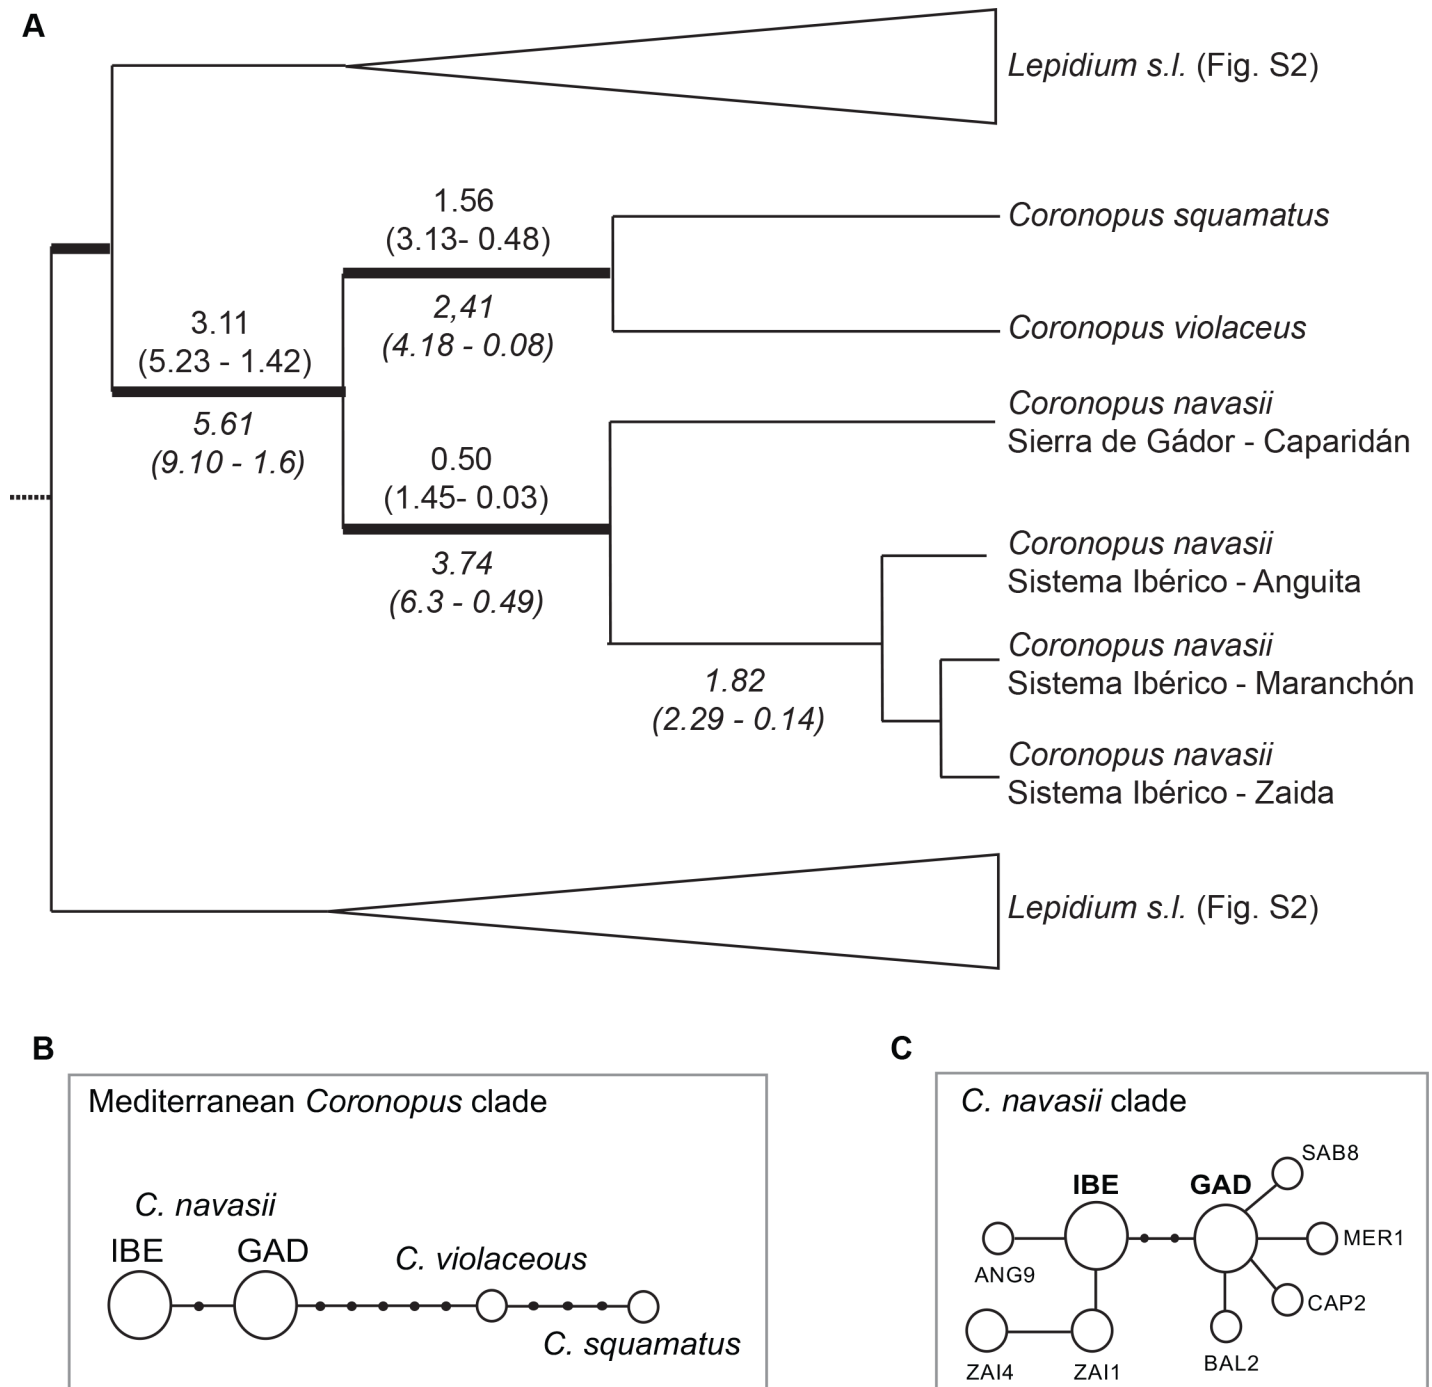

**Fig 3. Phylogenetic and phylogeographic results.** (a) Phylogenetic reconstruction of the Mediterranean clade of *Coronopus* (*C. navasii*, *C. squamatus*, *C. violaceus*) extracted from the Maximum Clade Credibility trees obtained in BEAST from the nuclear (ITS) and the plastid (*trnT-trnL*) *Lepidium* matrices (S4 Fig). Divergence time ages are only specified for supported branches. Thick lines indicate branches with a posterior probability of 1.00 in both the nuclear and plastid analyses. Ages recovered in the analysis of the nuclear *Lepidium* matrix are provided above branches, whereas the ones obtained from the plastid *Lepidium* matrix are indicated below. (b) Haplotype network of the Mediterranean clade of *Coronopus* obtained from the Statistical Parsimony analysis of the plastid *trnL-trnF* and *trnT-trnL* spacers as implemented in TCS. (c) Haplotype network of the *Coronopus navasii* clade obtained from the Statistical Parsimony analysis of the plastid *trnT-trnL*, *rps16-trnQ* and *trnH-psbA* spacers as implemented in TCS. Correspondence between haplotypes and samples are specified in Table 1.

doi:10.1371/journal.pone.0159484.g003

sequence variation of the remaining three plastid regions is as follows: two variable and potentially informative sites in the *trnT-trnL* region, two variable and potentially informative sites in *rps16-trnQ* and one variable and potentially informative site in *trnH-psbA*. All the 24 individuals from *Sierra de Gádor* display identical sequences for the three DNA regions in terms of nucleotide substitutions. Only individual 8 from *Sabinar* pond displays a nucleotide substitution in the *trnH-psbA* region. Four 1-pair base indels were detected within *Sierra de Gádor*, each of them exclusive to one individual in each population. The *Sistema Ibérico* populations exhibit more variability than *Sierra de Gádor* in terms of nucleotide substitutions. Six individuals (individuals 1, 2, 4, 6, 7, 10) in the *Zaida* population display one nucleotide substitution in *rps16-trnQ* region, and three of these six individuals display a further substitution in *trnH-psbA* region. An additional indel is detected in one individual of the *Anguita* population (individual 9). Individuals from *Sierra de Gádor* differ from those of *Sistema Ibérico* in three nucleotide substitutions.

**Haplotype networks.** The statistical parsimony analysis of the Mediterranean *Coronopus* clade matrix reveals a single substitution-based haplotype network with no loop (Fig 3B). Thirteen haplotypes are recovered, four detected within the dataset and nine missing needed to connect the detected haplotypes. Two geographically well-defined haplotypes are detected within *C. navasii* connected through one missing haplotype (Fig 3B). Two haplotypes are detected within the sister-group congruent with the two species included (*C. squamatus* and *C. violaceus*) and connected through three missing haplotypes. The remaining five missing haplotypes connect the *Gádor* haplotype of *C. navasii* to the North African *C. violaceus* (Fig 3B).

The statistical parsimony analysis of the *C. navasii* matrix recovers a single haplotype network with nine haplotypes found within the *C. navasii* dataset and two missing haplotypes (Fig 3C, Table 1). Nineteen of the 24 individuals from *Sierra de Gádor* share the same internal haplotype (GAD) while the remaining four, one from each population, display a different tip haplotype (BAL2, CAP2, MER1, SAB8, Table 1). Twenty individuals of the *Sistema Ibérico* share the same internal haplotype (IBE). Two additional haplotypes are detected in the *Zaida* population (ZAI1, ZAI4), shared by three individuals each and individual 9 from the *Anguita* population displays a different haplotype based on a single-base indel (ANG9). Two missing haplotypes connect the widespread *Sierra de Gádor* haplotype (GAD) with the widespread IBE haplotype from the *Sistema Ibérico* (Fig 3C).

**Gene flow and genetic differentiation.** The AMOVA analysis assigns the greatest amount of variation between the two geographical groups (Central East and Southeast Spain, 84.14%, Table 3). Very limited level of differentiation is detected among populations within groups (5.18%, Table 3) in comparison to the one estimated within populations irrespective to the group of population to which they belong (10.68, Table 3). Results of gene flow estimated with

**Table 3. Genetic differentiation and gene flow estimates recovered from the analyses conducted in Arlequin and dnaSP softwares.**

| AMOVA analysis                              |                                          |                |                         |
|---------------------------------------------|------------------------------------------|----------------|-------------------------|
| Source of variation                         | Df                                       | Sum of Squares | Percentage of variation |
| Among groups (Central East–Southeast Spain) | 1                                        | 38.138         | 84.14                   |
| Among populations within groups             | 5                                        | 3.958          | 5.18                    |
| Within populations                          | 43                                       | 8.164          | 10.68                   |
| Gene flow estimates from DNA sequences      |                                          |                |                         |
| FST = 0.861                                 | Number of migrants per generation = 0.04 |                |                         |
| Gene flow estimates from haplotypes         |                                          |                |                         |
| GST = 0.442                                 | Number of migrants per generation = 0.32 |                |                         |

doi:10.1371/journal.pone.0159484.t003

dnaSP are consistent with the degree of genetic isolation inferred from AMOVA results. Gene flow estimation shows a very high genetic differentiation between groups ( $F_{ST} = 0.861$ ) and a low number of migrants per generation ( $N_m = 0.04$ ). Similarly,  $G_{ST}$  values are also high ( $G_{ST} = 0.442$ ,  $N_m = 0.32$ ), also supporting a high level of isolation.

### Species distribution modeling

The six applied algorithms perform similarly with only marginal significant differences between models (S4 Table). The minimum mean score obtained is 0.8155 in the ANN model. The presence-absence threshold for the ensemble model maximizes AUC (0.92) at a probability value of 0.55. The predictor importance according to each model is variable between models (Table 2). In general, models allocate more importance to temperature variables or to their interactions with precipitation. For instance, GLM concedes greater importance to annual mean temperature and mean temperature in the driest quarter together with topographic exposure, and much less relevance to hydric constraints. Annual precipitation is in general less relevant.

The current topoclimatic niche suitability predicted by models fits the present-day distribution of the species at high altitudes in *Sierra de Gádor* and *Sistema Ibérico* without filtering distribution with soil properties (S5A Fig). The rest of mountain regions in the Iberian Peninsula show lower suitability. Projected distributions under the three climate change scenarios considering soil properties show very limited niche suitability. The future climate scenarios show a progressive loss of climate suitability in all cases but with differences. Under RCP 2.6 the current mountain ranges where the species is present are maintained, whereas under 6.0 and 8.5 they show a greater decrease. When accounting for clay soils, the decrease of suitable areas is dramatically and the species would eventually disappear from current areas, with only suitable areas remaining in the Pyrenean range. Comparison of lost and gained cells in the present-day model and the projected ones reveals a net decrease in suitability for current areas and a northward increase of suitable areas availability under the three emission trajectories considered (Table 4). This increase is higher for the 2050 period than to the 2070 one, where the expected number of suitable cells decreases in scenarios 2.6 and 8.5. Filtering projected maps with soil properties provides similar results but with a markedly decrease in the availability of suitable areas (Table 4) as demonstrated by suitable maps. Proportion of gained and lost cells differed among RCPs. Scenario 2.6 shows a negative change rate of -4.8%, whereas scenarios 6.0 and 8.5 reveal changes of -24% and +12% respectively (Table 4), the latter due to a range shift towards

**Table 4. Proportion of lost/gained cells between time periods according to three selected scenarios of greenhouse gases EMISSIONS.**  
RCP = Representative Concentration Pathways scenarios of greenhouse gases considered.

| RCP scenario | Time period   | Percentage of lost cells |               | Percentage of gained cells |                | Change rate |                |
|--------------|---------------|--------------------------|---------------|----------------------------|----------------|-------------|----------------|
| 2.6          | Present- 2050 | 63.86                    | <b>79.68</b>  | 6.471                      | <b>108.958</b> | -57.389     | <b>29.279</b>  |
|              | Present- 2070 | 63.02                    | <b>82.156</b> | 6.356                      | <b>77.276</b>  | -56.664     | <b>-4.88</b>   |
|              | 2050–2070     | 60.769                   | <b>93.154</b> | 9.428                      | <b>167.444</b> | -51.341     | <b>74.29</b>   |
| 6.0          | Present- 2050 | 82.54                    | <b>98.106</b> | 5.798                      | <b>194.61</b>  | -76.742     | <b>96.504</b>  |
|              | Present- 2070 | 60.769                   | <b>93.154</b> | 9.428                      | <b>167.444</b> | -51.341     | <b>74.29</b>   |
|              | 2050–2070     | 93.195                   | <b>99.782</b> | 4.087                      | <b>75.601</b>  | -89.108     | <b>-24.181</b> |
| 8.5          | Present- 2050 | 8.975                    | <b>29.183</b> | 10.678                     | <b>2.761</b>   | 1.702       | <b>-26.423</b> |
|              | Present- 2070 | 53.797                   | <b>59.131</b> | 1.595                      | <b>71.876</b>  | -52.202     | <b>12.746</b>  |
|              | 2050–2070     | 81.188                   | <b>91.809</b> | 3.573                      | <b>35.311</b>  | -77.615     | <b>-56.498</b> |

Bold numbers are results accounting for presence of clay soils.

doi:10.1371/journal.pone.0159484.t004

the Pyrenees. Regarding past climate suitability, the LIG projection shows a wide distribution of available climatic niche including large but discontinuous area between *Sistema Ibérico* and *Sierra de Gádor* (Fig 4H). Conversely, the projection to the LGM period shows less suitable climatic areas in lower altitudes when compared to current predicted potential distribution (Fig 4I).

## Discussion

The pre-Holocene context estimated for the divergence between *Sistema Ibérico* and *Sierra de Gádor* allows us rejecting the human-mediated 'transhumance hypothesis' for the origin of the *C. navasii* disjunction (Fig 3A). A long-term isolation and the need to consider at least two independently evolving (and conservation) units are suggested by (1) the haplotype differentiation between *Sistema Ibérico* and *Sierra de Gádor* without any detected shared haplotype and two missing haplotypes connecting the two disjunct areas (Fig 3B), and (2) the great genetic differentiation and low gene flow suggested by molecular estimates (Table 3). Future climate change models do not predict a decrease of suitable areas but a severe shift in their location (Fig 4B–4G and S5B–S5G Fig) that may require the species migration to survive. This coupled with the rarity of the species habitat and the intrinsic constraints superimposed by the natural fragmentation of this habitat might compromise its long-term survival. These reasons force the imperative implementation of new actions in the *Sistema Ibérico* populations in order to contemplate the whole genetic variability of this species and properly address the above-mentioned challenges faced.

## Pre-Holocene dispersal for *Coronopus navasii* disjunction

The confirmed phylogenetic placement of *C. navasii* as sister to the Mediterranean species *C. squamatus* and *C. violaceus* [26] reflects an interesting biogeographic and environmental congruence (Fig 3A). Both the North African *C. violaceus* and the Iberian *C. navasii* are hemicryptophytes and restricted endemics to temporary ponds at medium to high altitudes [65]. However, *C. violaceus* is more closely related to the annual and widely distributed *C. squamatus* than to the alike *C. navasii*. *Coronopus squamatus* inhabits ruderal, open and xeric disturbed habitats up to 1,200 m.a.s.l. across the Mediterranean Basin and C European areas [66, 67]. The terminal placement of this widespread species could be interpreted as the acquisition of key innovation features (annuality and low environmental requirements) that may have increased chances of dispersal and population establishment success [66, 67]. The biogeographical scenario under this hypothesis implies a geographically confined ancestor for the Mediterranean clade of *Coronopus* with the range expansion occurring along the branch of *C. squamatus*. An alternative but less plausible explanation is that annuality and low environmental requirements were ancestral in the clade, being hemicryptophyte habit and high habitat specificity acquired independently both in the Iberian Peninsula (*C. navasii*) and North Africa (*C. violaceus*). This evolutionary path would resemble the general tendency observed among the California flora, where endemic specialists of 'vernal pools' are derived from 'terrestrial antecessors', although in these cases acquisition of annuality is linked to the 'vernal pool' specialists [68, 69]. Under this hypothesis a widespread ancestor of the Mediterranean clade of *Coronopus* would be expected. To address these questions with certainty, a comprehensive sample embracing the whole *C. squamatus* distribution and the inclusion of the fourth Mediterranean species of *Coronopus* (*C. lepidioides* (Coss. & Durieu) Kuntze, North Africa) are needed together with a comparative study of the phylogenetic signal of traits related to dispersal capacity.

The Miocene-Pleistocene origin for the *C. navasii* internal divergence (6.30–0.49 Mya according to *trnT-trnL* and 1.45–0.03 Mya according to ITS; Fig 3A) does not fit the Holocene

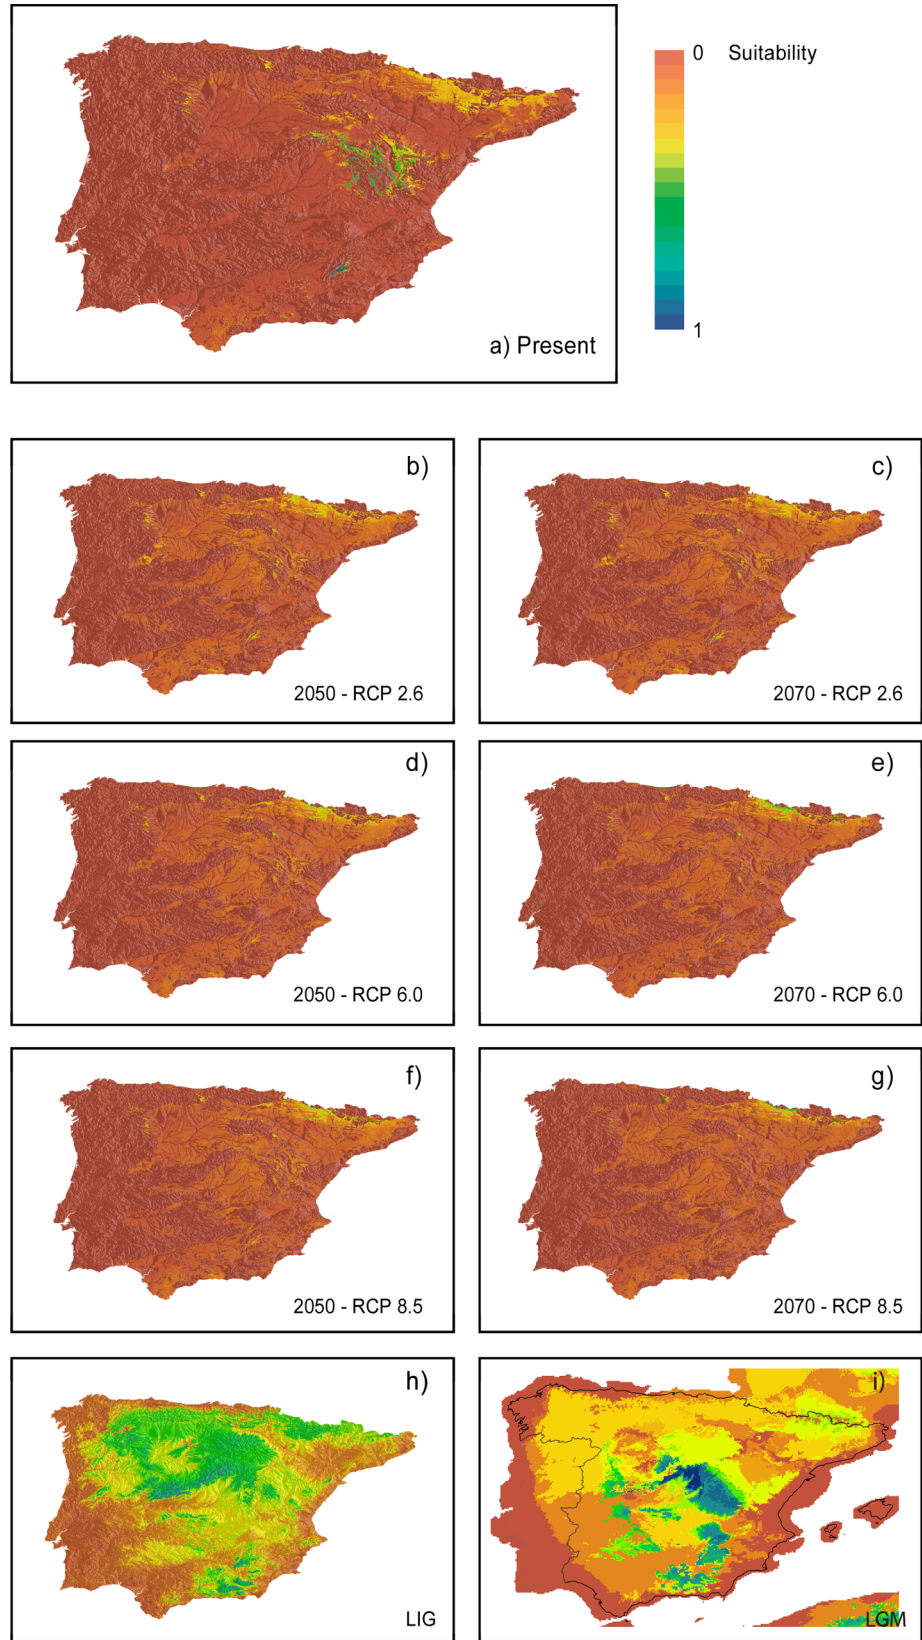



**Fig 4. Topoclimatic niche suitability maps.** Results from the six algorithms applied to model the species distribution accounting for climate and topographic predictors. A: Present projection masked with clay soils layers; B-G: Future conditions projections under different emissions scenarios masked with clay soils layers; H-I: Climate suitability niche models projected to past conditions to Last Interglacial period (LIG) and Last Glacial Maximum (LGM) period climatic conditions, without considering soil properties.

doi:10.1371/journal.pone.0159484.g004

divergence ( $< 0.01$  Mya) that would be expected under the ‘transhumance hypothesis’, even considering the great uncertainty reflected by the large Confidence Intervals detected. In fact, this traditional land use became an active practice in Spain mainly in historic times and reached its peak during the first quarter of XVI Century [23]. Therefore, transhumance can be ruled out as a plausible explanation for the origin of the *C. navasii* disjunction (Fig 3A). On the other hand, vicariance does not emerge as an alternative hypothesis for reasons added to the natural fragmentation of *C. navasii* habitat. Also, the lack of any shared haplotype as a vicariance hypothesis may predict and the already scattered suitable areas distribution in the past inferred in this study are not congruent with a vicariance scenario.

The most plausible scenario for the *C. navasii* disjunction is a northward dispersal from *Sierra de Gádor* to the *Sistema Ibérico* as inferred by the fact that the *C. navasii* network is connected to the sister-group through a haplotype from *Sierra de Gádor* (Fig 3B). This northward direction is consistent with the northward progressive climatic recovery identified after the LGM from paleobotanical and geological data [70] that has also been used to explain other mountain plant disjunctions in the Mediterranean [71, 72]. Also, a similar pathway of northward dispersal has been proposed for Iberian xerophytes such as *Ferula loscosii* (Apiaceae) or the *Vella pseudocytisus-V. aspera* complex during the Pliocene [73, 74] as the onset of the Mediterranean climate was creating dry continental niches in NE Iberia. From a biological point of view, dispersal is plausible since epizoochory has been described as the secondary dispersal mechanism for *C. navasii* [5]. Besides, *C. navasii* fruit phenology coincides with summer movements of migrating animals that use these ponds as water supplies ([16, 75], Fig 2), which are particularly essential in semiarid environments like the ones where *C. navasii* occurs [76]. However, the *Sierra de Gádor*—*Sistema Ibérico* path is not a common migratory route for birds, at least currently [28]. Finally, whether the dispersal was the result of long distance dispersal (LDD) or stepping-stone (SSD) process remains open. The appearance of intermediate suitable areas in past projections (Fig 4H–4I) makes the SSD hypothesis likely, although LDD cannot be ruled out.

## Conservation implications and management strategy

Our findings on the haplotype differentiation between the *Sistema Ibérico* and *Sierra de Gádor* urge the implementation of targeted local actions into the *Sistema Ibérico* populations in a coordinated action with the on-going *Sierra de Gádor* program. We suggest considering both areas as independent operational conservation units (OCUs). The  $> 500$  km distance between both areas limits the implementation of common legal actions because of different regional political competences. Moreover, the conservation strategy of the *Sierra de Gádor* metapopulation does not seem enough to preserve the total genetic diversity of the species due to the different haplotypes and great isolation detected in the *Sistema Ibérico*. The recognition of at least two OCUs is therefore not only a functional proposal, but also an evolutionary-oriented action.

A set of *ex situ* actions must be taken on the two new populations found in 2014 including collecting seeds to preserve in germplasm banks. In parallel, a proper evaluation of the inter-annual demographic fluctuation of each of the three *Sistema Ibérico* populations through consecutive annual censuses is needed. The four censuses available from the *Anguita* population

reveal significant oscillations in population size (<100 reproductive individuals in 2004 [16]; ca. 800 in 2012 [28]; ca. 600 in 2014 and ca. 1000 in 2015). However, the limited number of censuses together with the eight years lasting between the first two makes any inference rather speculative. A targeted and effective sampling of suitable areas based on our niche modeling results is recommended, given the occurrence of similar ponds in other places of the *Sistema Ibérico* and surrounding areas.

Temporary ponds are waterholes subjected to extremely changing seasonal environmental conditions that are particularly stressed in the area of study because of the inter-annual rainfall fluctuation superimposed by the unpredictable Mediterranean climate. The general importance of environmental variables that niche models attribute to temperature, precipitation and topography are consistent with this interpretation. Temperature variables scored higher than precipitation and topography across the majority of the models, suggesting that altitude, which determines thermic conditions, can be a strong limiting factor for the species distribution. The lower scores assigned to precipitation variables may be explained indeed by the mentioned higher fluctuation in rainfall regimes, which lowers the explanatory ability of these constraints. Nevertheless, additional analyses at finer scales when spatial data are available would be required to clarify the actual role of predictors. The application of a finer resolution is especially relevant when local topography is an important constraint such as it is in the temporary ponds of *C. navasii* (e.g. [77]). Accounting for spatial autocorrelation would be important too because of the aggregated distribution of the individuals of *C. navasii* around the ponds. Our results on future projections confirm climate change as a likely driving force promoting extinction in *C. navasii* by: (1) accelerating local extinction and migration to higher altitudes or latitudes, and (2) altering the seasonal water system of the ponds where the species occurs due to the predicted aridity and evapo-transpiration rates increase. Therefore, linking inter-annual climate variability to demographic fluctuations might be critical to propose effective actions to face climate change, since future projections predict northward shift in the species distribution coupled with a decrease in habitat suitability in current sites (Fig 4B–4G).

In addition to the demographic and genetic consequences derived from the annual and inter-annual environmental variation, *C. navasii* is constrained by the limited patch size and habitat fragmentation that naturally characterized its habitat [78]. The higher levels of genetic variation detected within populations (11%) than among populations (5%) is interpreted as evidence that both disjunct areas follow a metapopulation dynamics (Table 3). Description of the metapopulation dynamic in the *Sistema Ibérico* is key to determine the impact of local inter-annual demographic fluctuations to the overall system. Indeed, livestock have already been suggested as key factors to keep the metapopulation dynamics in *Sierra de Gádor* (Fig 2; [5]). Determining the actual impact of flock movements in *C. navasii* dispersal between local populations and new pond colonization rates would be interesting to design a sustainable management of flock activity that ensures the long-term survival in both disjunct areas.

Mediterranean temporary ponds are isolated and uncommon habitats essential for migratory animals [75] that hold a high variety of rare endemic species. Only a few local studies on the flora and vegetation of these ponds [21, 79] have been conducted to improve knowledge and conservation information on plant biodiversity in these microhabitats [78, 80]. This sharply contrasts with the large number of studies performed in other parts of the world on the flora of seasonal ponds in Mediterranean climates (Chile, Australia, California; [68]). Because of limited water availability in the Mediterranean climate, humans have traditionally used these ponds for agriculture, flock watering or domestic supply. The species living in these ponds and all the associated interaction networks depend on the hydrological annual cycle maintenance. However, during last decades, drainage for extensive agriculture or non-controlled livestock watering is leading to a premature drying out of these ponds [81]. Artificial

flooding of ponds during summer is also a common practice that has been reported as a negative activity for the community survival [19, 82]. Considering individuals of *C. navasii* produce their aerial parts as water drains, the maintenance of the annual water dynamics of the pond is essential. Artificial flooding leading to a permanent water level in ponds is therefore a harmful practice for *C. navasii* survival. However, controlled artificial flooding that ensures maintenance of the natural dynamics of water ponds would be a positive management practice since it will ensure the preservation of the species.

## Supporting Information

**S1 Fig. *Coronopus navasii* growing in the mud.** A: detail of a reproductive individual in bloom (*Sierra de Gádor*); B: detail of the root and basal rosette (*Sistema Ibérico*).  
(TIF)

**S2 Fig. Maximum Clade Credibility tree obtained from the Bayesian analysis implemented in BEAST of the *matK* plastid gene from 79 Malvaceae sequences using *Gerrardina* (Hernandiaceae) and *Tapiscia* (Celastraceae) as outgroup.** Green circles highlight nodes selected as calibration points for the *Lepidium* divergence age estimation. Nodes used as calibration points (red asterisks) in each analysis are numbered according to the text.  
(PDF)

**S3 Fig. Histogram of the sum of squared deviation for each of the four fossil nodes when used as single calibration point.**  
(PDF)

**S4 Fig. Maximum Clade Credibility tree obtained from the Bayesian analysis implemented in BEAST.** Nodes used as calibration points (red asterisks) in each analysis are numbered according to the text. (a) Chronogram from the *nrDNA* ITS region of 106 samples of *Lepidium s.l.* plus *Hornungia petraea* as the outgroup. (b) Chronogram from the plastid *trnT-trnL* spacer of 106 samples of *Lepidium s.l.* plus *Hornungia petraea* as the outgroup.  
(PDF)

**S5 Fig. Niche suitability maps resulting from the six algorithms applied to model the species distribution accounting only for climate and topographic predictors but not masked with clay soils layers.** (a) Present projections. (f-g) Future conditions under different emissions scenarios.  
(PDF)

**S1 Table. List of the studied material of *Lepidium s.l.* used for the phylogenetic-based analyses.**  
(DOCX)

**S2 Table. List of the studied material of Malvaceae used for the divergence age estimate.**  
(DOCX)

**S3 Table. Results from the Bayes Factor (BF) and Approximate Unbiased (AU) hypothesis test analyses.** Bayes Factors for the competing hypotheses are provided. Difference in the Likelihood between the competing hypotheses and the best topology as well as the p-values obtained from the AU test are given. Asterisks indicate evidence in favor to that hypothesis for the BFs and not rejected hypotheses in the AU tests.  
(DOCX)

**S4 Table. Mean  $\pm$  SD of AUC scores for the six algorithms used in distribution models.**  
(DOCX)

## Acknowledgments

The authors thank Carmen Rodríguez-Hiraldo and the Geodiversity and Biodiversity Service of Junta de Andalucía, the Aragonese Institute of Environmental Management (INAGA, Government of Aragón) and the Department of Agriculture of the Government of Castilla-La Mancha for fieldwork permissions, Esteban Salmerón, Fabián Martínez and Juan Mota for their help with field sampling in *Sierra de Gádor* and highly valuable fieldwork assistance, the ranger Angel Pardo and Julián García-Muñoz for their essential comments and help on the fieldwork carried out in *Sistema Ibérico*, and the staff of VAL and JACA herbaria for providing dried material, SEO/Birdlife for kindly supplying information about the Spanish ringing database, Juan Mota for his useful inputs on an earlier version of the manuscript, Omar Fiz-Palacios for advice on divergence age estimates, Klaus Mummenhoff for kindly providing *Lepidium* DNA matrices, Javier Fuertes and lab-technician staff of the Real Jardín Botánico de Madrid for lab help, and Juli Caujapé and Ruth Jaén for their suggestions on sampling regions and facilitating the primers. We also thank Nick Jensen for checking and correcting the English in this article.

## Author Contributions

Conceived and designed the experiments: SMH AGF JCMS VV. Performed the experiments: SMH AGF JCMS VV. Analyzed the data: SMH AGF JCMS VV. Contributed reagents/materials/analysis tools: SMH AGF JCMS VV. Wrote the paper: SMH AGF JCMS VV.

## References

1. Caro T, O'Doherty G. On the use of surrogate species in conservation biology. *Conserv Biol*. 1999; 13: 805–814.
2. Clucas B, McHugh K, Caro T. Flagship species on covers of US conservation and nature magazines. *Biodivers Conserv*. 2008; 17: 1517–1528.
3. Clark TW, Crete R, Cada J. Designing and managing successful endangered species recovery programs. *J Environ Manage*. 1989; 13: 159–170.
4. Gómez-Campo C, Malato-Beliz J. The Iberian Peninsula. In: Gómez-Campo C, editors. *Plant Conservation in the Mediterranean Area*, Dr. W. Junk Publishers, Dordrecht; 1985. pp. 47–70.
5. Mota JF, Aguilera AM, Garrido JA, Giménez-Luque E, Jiménez-Sánchez ML, Pérez-García FJ et al. *Coronopus navasii* Pau. In: Bañares Á, Blanca G, Güemes J, Moreno JC, Ortiz S, editors. *Atlas y Libro Rojo de la Flora Vasculare Amenazada de España*. Dirección General de Conservación de la Naturaleza, Madrid; 2003. pp. 204–205.
6. Vivero JL, Hernández-Bermejo J, Prados J. *Coronopus navasii* Pau. In: Blanca G, Cabezudo B, Hernández Bermejo JE, Herrera CM, Molero Mesa J, Muñoz J et al., editors. *Libro Rojo de la Flora Silvestre Amenazada de Andalucía*. Tomo I: Especies en Peligro de Extinción. Consejería de Medio Ambiente, Junta de Andalucía, Sevilla; 1999. pp. 90–93.
7. Rabinowitz D. Seven forms of rarity. In: Sygne H, editors. *The Biological Aspects of Rare Plant Conservation*. John Wiley and Sons, Chichester; 1981. pp. 205–217.
8. Moreno-Saiz JC, coord. *Lista Roja 2008 de la flora vascular española*. Ministerio de Medio Ambiente, Medio Rural y Marino–Sociedad Española de Biología de la Conservación de Plantas, Madrid; 2008.
9. Schemske DW, Husband BC, Ruckelshaus MH, Goodwillie C, Parker IM, Bishop JG. Evaluating approaches to the conservation of rare and endangered plants. *Ecol*. 1994; 75: 584–606.
10. Cabezudo B, Talavera S, Blanca G, Salazar C, Cueto M, Valdés B et al. *Lista Roja de la flora vascular de Andalucía*. Junta de Andalucía, Sevilla; 2005.
11. MARM, Ministerio de Medio Ambiente, Medio Rural y Marino. Real Decreto 139/2011, de 4 de febrero, para el desarrollo del Listado de Especies Silvestres en Régimen de Protección Especial y del Catálogo Español de Especies Amenazadas; 2011. BOE 46: 20912–20951.
12. CE, Council of Europe. *Convention on the Conservation of European Wildlife and Natural Habitats*, Bern; 1979.
13. EC, European Commission. *Council Directive 92/43/EEC on the Conservation of Natural Habitats and of Wild Fauna and Flora*, Brussels; 1992.

14. Iriando JM, De Hond LJ, Gómez-Campo C. Current research on the biology of threatened plant species of the Mediterranean Basin and Macaronesia: a database. *Bocconea*. 1994; 4: 403–407.
15. Sainz-Ollero H, Hernández-Bermejo JE. Experimental reintroductions of endangered plant species in their natural habitats in Spain. *Biol Conserv*. 1979; 16: 195–206.
16. López-Jiménez N, García-Muñoz J. *Coronopus navasii* Pau (Brassicaceae) en el noroeste de Guadalupe (España). *Conservación Vegetal*. 2006; 10: 13–15.
17. Melendo M, Giménez-Luque E, Cano E, Gómez-Mercado F, Valle F. The endemic flora in the south of the Iberian Peninsula: taxonomic composition, biological spectrum, pollination, reproductive mode and dispersal. *Flora*. 2003; 198: 260–276.
18. Pardo Gracia A, López Udías S, Fabregat Lluca, C, Gómez-García D. *Coronopus navasii* Pau (Brassicaceae) novedad para la flora de Aragón. *Flora Montiberica*. 2014; 58: 103–108.
19. Zaccharias I, Zamparas M. Mediterranean temporary ponds. A disappearing ecosystem. *Biodivers Conserv*. 2010; 19: 3827–3834.
20. Gómez-Mercado F, Giménez-Luque E. Análisis comparativo de la endemoflora de la Sierra de Gádor. *Studia Botánica*. 1998; 17: 53–68.
21. Giménez-Luque E, Delgado IC, Gómez-Mercado F. Comunidades vegetales de las balsas de la Sierra de Gádor (Almería). *Lazaroa*. 2006; 27: 79–88.
22. Valbuena-Carabaña M, López de Heredia U, Fuentes-Utrilla P, González-Doncel I, Gil L. Historical and recent changes in the Spanish forests: A socio-economic process. *Rev Palaeobot Palynol*. 2010; 162: 492–506.
23. Ruiz M, Ruiz JP. Ecological history of transhumance in Spain. *Biol Conserv*. 1986; 37: 73–86.
24. Manzano P, Malo JE. Extreme long-distance seed dispersal via sheep. *Front Ecol Environ*. 2006; 4: 244–248.
25. Hernández-Hernández T, Colorado WB, Sosa V. Molecular evidence for the origin and evolutionary history of the rare American desert monotypic family Setchellanthaceae. *Org Divers Evol*. 2013; 13: 485–496.
26. Mummenhoff K, Polster A, Muhlhausen A, Theiben G. *Lepidium* as a model system for studying the evolution of fruit development in Brassicaceae. *J Exp Bot*. 2009; 60: 1503–1513. doi: [10.1093/jxb/ern304](https://doi.org/10.1093/jxb/ern304) PMID: [19052256](https://pubmed.ncbi.nlm.nih.gov/19052256/)
27. CAA, Comunidad Autónoma de Andalucía. Acuerdo de 13 de marzo de 2012, del Consejo de Gobierno, por el que se aprueban los planes de recuperación y conservación de determinadas especies silvestres y hábitats protegidos. *BOJA*. 2012; 60: 164–172.
28. Martín-Hernanz S, González A, Moreno JC, Valcárcel V. Reevaluación de la estrategia de conservación de *Coronopus navasii*. *Conservación Vegetal*. 2014; 18: 13–15.
29. Hamilton MB. Four primer pairs for the amplification of chloroplast intergenic regions with intraspecific variation. *Mol ecol. Primer Notes*. 1999; 8: 513–525.
30. Shaw J, Lickey EB, Beck JT, Farmer SB, Liu W, Miller J, Siripun KC, Winder CT, Schilling EE, Small RL. The tortoise and the hare II: relative utility of 21 noncoding chloroplast DNA sequences for phylogenetic analysis. *Am J Bot*. 2005; 92: 142–166. doi: [10.3732/ajb.92.1.142](https://doi.org/10.3732/ajb.92.1.142) PMID: [21652394](https://pubmed.ncbi.nlm.nih.gov/21652394/)
31. Taberlet P, Gielly L, Pautou G, Bouvet J. Universal primers for amplification of three non-coding regions of chloroplast DNA. *Plant Mol Biol*. 1991; 17: 1105–1109. PMID: [1932684](https://pubmed.ncbi.nlm.nih.gov/1932684/)
32. Shaw J, Lickey EB, Schilling EE, Small RL. Comparison of whole chloroplast genome sequences to choose noncoding regions for phylogenetic studies in angiosperms: the tortoise and the hare III. *Am J Bot*. 2007; 94: 275288.
33. Little DP, Schwarzbach AE, Adams RP, Hsieh CF. The circumscription and phylogenetic relationships of *Callitropsis* and the newly described genus *Xanthocyparis* (Cupressaceae). *Am J Bot*. 2004; 91: 1872–1881. doi: [10.3732/ajb.91.11.1872](https://doi.org/10.3732/ajb.91.11.1872) PMID: [21652334](https://pubmed.ncbi.nlm.nih.gov/21652334/)
34. Kearse M, Moir R, Wilson A, Stones-Havas S, Cheung M, Sturrock S, et al. Geneious Basic: an integrated and extendable desktop software platform for the organization and analysis of sequence data. *Bioinform*. 2012; 28 (12): 1647–1649. Available: <http://www.geneious.com/>. Accessed 2015.
35. Edgar RC. MUSCLE: multiple sequence alignment with high accuracy and high throughput. *Nucleic Acids Res*. 2004; 32: 1792–1799. PMID: [15034147](https://pubmed.ncbi.nlm.nih.gov/15034147/)
36. Oyama RK, Clauss MJ, Formanova N, Kroymann J, Schmid KJ, Vogel H et al. The shrunken genome of *Arabidopsis thaliana*. *Plant Syst Evol*. 2008; 273: 257–271.
37. Burgess KS, Fazekas AL, Kesanakurti PR, Graham SW, Husband BC et al. Discriminating plant species in a local temperate flora using the *rbcl*+*matK* DNA barcode. *Methods Ecol Evol*. 2011; 2: 333–340.

38. Li DZ, Gao LM, Li HT, Wang H, Ge XJ, Liu JQ et al. Comparative analysis of a large dataset indicates that internal transcribed spacer (ITS) should be incorporated into the core barcode for seed plants. *Proc Natl Acad Sci U S A*. 2011; 108: 19641–19646. doi: [10.1073/pnas.1104551108](https://doi.org/10.1073/pnas.1104551108) PMID: [22100737](https://pubmed.ncbi.nlm.nih.gov/22100737/)
39. de Vere N, Rich TCG, Ford CR, Trinder SA, Long C, Moore CM et al. DNA Barcoding the Native Flowering Plants and Conifers of Wales. *PLoS ONE*. 2012; 7: e37945. doi: [10.1371/journal.pone.0037945](https://doi.org/10.1371/journal.pone.0037945) PMID: [22701588](https://pubmed.ncbi.nlm.nih.gov/22701588/)
40. Drummond AJ, Suchard MA, Xie D & Rambaut A. Bayesian phylogenetics with BEAUti and the BEAST 1.7. *Mol Biol Evol*. 2012; 29: 1969–1973. Available: <http://tree.bio.ed.ac.uk/software/beam/>. Accessed 2015. doi: [10.1093/molbev/mss075](https://doi.org/10.1093/molbev/mss075) PMID: [22367748](https://pubmed.ncbi.nlm.nih.gov/22367748/)
41. Posada D. JModelTest: phylogenetic model averaging. *Mol Biol Evol*. 2008; 25: 1253–1256. doi: [10.1093/molbev/msn083](https://doi.org/10.1093/molbev/msn083) PMID: [18397919](https://pubmed.ncbi.nlm.nih.gov/18397919/)
42. Gandolfo MA, Nixon KC, Crepet WL. A new fossil flower from the Turonian of New Jersey: *Dressiantha bicarpellata* Gen. Et Sp. Nov. (Capparales). *Am J Bot*. 1998; 85: 964–974. PMID: [21684980](https://pubmed.ncbi.nlm.nih.gov/21684980/)
43. Beilstein MA, Nagalingum NS, Clements MD, Manchester SR, Mathews S. Dated molecular phylogenetics indicate a Miocene origin for *Arabidopsis thaliana*. *Proc Natl Acad Sci U S A*. 2010; 107: 18724–18728. doi: [10.1073/pnas.0909766107](https://doi.org/10.1073/pnas.0909766107) PMID: [20921408](https://pubmed.ncbi.nlm.nih.gov/20921408/)
44. Becker HF. Oligocene plants from the upper Ruby River Basin, southwestern Montana. *Geological Society of America Memoir*. 1961; 82: 1–127.
45. Selmeier A. *Capparidoxylon holleisii* nov. spec., a silicified *Capparis* (Capparaceae) wood with insect coprolites from the Neogene of southern Germany. *Zitteliana*. 2005; 45: 199–209.
46. Near TJ, Meylan PA, Shaffer HB. Assessing concordance of fossil calibration points in molecular clock studies: An example using Turtles. *Am Nat*. 2005; 165: 137–146. PMID: [15729646](https://pubmed.ncbi.nlm.nih.gov/15729646/)
47. Rambaut A, Drummond AJ. Tracer v1.4. 2007. Available: <http://beast.bio.ed.ac.uk/Tracer>. Accessed 2012.
48. Shimodaira H. An approximately unbiased test of phylogenetic tree selection. *Syst Biol*. 2002; 51: 492–508. PMID: [12079646](https://pubmed.ncbi.nlm.nih.gov/12079646/)
49. Jobb G, Haeseler Av, Strimmer K. TREEFINDER: a powerful graphical analysis environment for molecular phylogenetics. *BMC Evol Biol*. 2004; 4: 18. PMID: [15222900](https://pubmed.ncbi.nlm.nih.gov/15222900/)
50. Kass RE, Raftery AE. Bayes factors. *J Am Stat Assoc*. 1995; 90: 773–795.
51. Suchard MA, Weiss RE, Sinsheimer JS. Bayesian selection of continuous-time Markov Chain evolutionary models. *Mol Biol Evol*. 2001; 18: 1001–1013. PMID: [11371589](https://pubmed.ncbi.nlm.nih.gov/11371589/)
52. Xie W, Lewis PO, Fan Y, Kuo L, Chen MH. Improving marginal likelihood estimation for Bayesian phylogenetic model selection. *Syst Biol*. 2011; 60: 150–160. doi: [10.1093/sysbio/syq085](https://doi.org/10.1093/sysbio/syq085) PMID: [21187451](https://pubmed.ncbi.nlm.nih.gov/21187451/)
53. Bergsten J, Nilsson AN, Ronquist F. Bayesian test topology hypotheses with an example from Diving Beetles. *Syst Biol*. 2013; 62: 660–673. doi: [10.1093/sysbio/syt029](https://doi.org/10.1093/sysbio/syt029) PMID: [23628960](https://pubmed.ncbi.nlm.nih.gov/23628960/)
54. Templeton AR, Crandall KA, Sing SF. A cladistic analysis of the phenotypic associations with haplotypes inferred from restriction endonuclease mapping and DNA sequence data. III. Cladogram estimation. *Genetics*. 1992; 132: 619–633. PMID: [1385266](https://pubmed.ncbi.nlm.nih.gov/1385266/)
55. Clement M, Posada D, Crandall KA. TCS: a computer program to estimate gene genealogies. *Mol Ecol*. 2000; 9: 1657–1660. PMID: [11050560](https://pubmed.ncbi.nlm.nih.gov/11050560/)
56. Excoffier L, Laval G, Schneider S. Arlequin (version 3.0): An integrated software package for population genetics data analysis. *Evolutionary Informatics Online*. 2005. 1, 47–50.
57. Hudson RR, Slatkin M, Maddison P. Estimation of Levels of Gene Flow from DNA Sequence Data. *Genetics*. 1992; 132: 583–589 PMID: [1427045](https://pubmed.ncbi.nlm.nih.gov/1427045/)
58. Hijmans RJ, Cameron SE, Parra JL, Jones PG, Jarvis A. Very high resolution interpolated climate surfaces for global land areas. *Int J Climatol*. 2005; 25: 1965–1978.
59. ESRI. ArcGIS 9.3. 2008
60. IPCC: Stocker TF, Qin D, Plattner GK, Tignor M, Allen SK, Boschung J et al. *Climate Change 2013: The Physical Science Basis. Contribution of Working Group I to the Fifth Assessment Report of the Intergovernmental Panel on Climate Change*. Cambridge University Press, Cambridge, United Kingdom and New York; 2013.
61. Thuiller W, Lafourcade B, Engler R, Araújo MB. BIOMOD—A platform for ensemble forecasting of species distributions. *Ecography*. 2009; 32: 369–373.
62. R Development Core Team. *R: A Language and Environment for Statistical Computing*. Vienna, Austria: the R Foundation for Statistical Computing. ISBN: 3-900051-07-0. 2011. Available: <http://www.R-project.org/>. Accessed 2014.
63. Chevan A, Sutherland M. Hierarchical Partitioning. *Am Stat*. 2011; 45: 90–96.

64. Walsh C, Mac Nally R. The hier.part Package: Hierarchical Partitioning. (Part of: Documentation for R: A language and environment for statistical computing.) R Foundation for Statistical Computing, Vienna, Austria; 2003.
65. Rhazi L, Grillas P, Rhazi M. *Lepidium violaceum*. The IUCN Red List of Threatened Species; 2010. Available: <http://www.iucnredlist.org>. Accessed 2014.
66. Morales R. *Coronopus Zinn*. En: Castroviejo S., editors. Flora iberica. Volumen IV, Cruciferae-Monotropaceae. Real Jardín Botánico, CSIC, Madrid; 2993. pp. 331–333.
67. Radulovic N, Zlatkovic B, Skropeta D, Palic R. Chemotaxonomy of the peppergrass *Lepidium coronopus* (L.) Al-Shehbaz (syn. *Coronopus squamatus*) based on its volatile glucosinolate autolysis products. *Biochem Syst Ecol*. 2008; 36: 807–811.
68. Keeley JE, Zedler PH. Characterization and global distribution of vernal pools. In *Ecology, Conservation, and Management of Vernal Pool Ecosystems*. Witham CW, Bauder ET, Belk D, Ferren WR, Ornduff R, editors. California Native Plant Society (Sacramento, CA, USA); 1998. pp. 1–14.
69. Zedler PH. Vernal pools and the concept of “isolated wetlands”. *Wetlands*. 2003; 23: 597–607
70. Tichy G, Tomek C, Hsü KJ, Hofrichter S. Geologie und Entstehungsgeschichte. In: Hofrichter S, editors. *Das Mittelmeer: Fauna, Flora, Ökologie, Band 1, Allgemeiner Teil*. Heidelberg, Germany: Spektrum Akademischer Verlag. 2001; 56–101.
71. Kropf M, Comes HP, Kadereit JW. Long-distance dispersal vs. vicariance: the origin and genetic diversity of alpine plants in the Spanish Sierra Nevada. *New Phytol*. 2006; 172: 169–184. PMID: [16945099](https://pubmed.ncbi.nlm.nih.gov/16945099/)
72. Alarcón M, Vargas P, Sáez LI, Molero J, Aldasoro JJ. Genetic diversity of mountain plants: two migration episodes of Mediterranean *Erodium* (Geraniaceae). *Mol Phylogenet Evol*. 2012; 63: 866–876. doi: [10.1016/j.ympev.2012.02.031](https://doi.org/10.1016/j.ympev.2012.02.031) PMID: [22445449](https://pubmed.ncbi.nlm.nih.gov/22445449/)
73. Pérez-Collazos E, Sánchez-Gómez P, Jiménez JF, Catalán P. The phylogeographical history of the Iberian steppe plant *Ferula loscosii* (Apiaceae): a test of the abundant-centre hypothesis. *Mol Ecol*. 2009; 18: 848–861. doi: [10.1111/j.1365-294X.2008.04060.x](https://doi.org/10.1111/j.1365-294X.2008.04060.x) PMID: [19207254](https://pubmed.ncbi.nlm.nih.gov/19207254/)
74. Simón-Porcar V, Pérez-Collazos E, Catalán P. Phylogeny and systematics of the western Mediterranean *Vella pseudocytisus*-*V. aspera* complex (Brassicaceae). *Turk J Botany*. 2015; 39: 472–486.
75. Céréghino R, Biggs J, Oertli B, Declerck S. The ecology of European ponds: defining the characteristics of a neglected freshwater habitat. *Hydrobiologia*. 2008; 597: 1–6.
76. Alados CL, Puigdefábregas J, Martínez-Fernández J. Ecological and socio-economical thresholds of land and plant-community degradation in semi-arid Mediterranean areas of southeastern Spain. *J Arid Environ*. 2011; 75: 1368–1376.
77. Slavich E, Warton DI, Ashcroft MB, Gollan JR, Ramp D. Topoclimate versus macroclimate: how does climate mapping methodology affect species distribution models and climate change projections? *Divers Distrib*. 2014; 20: 952–963.
78. Kirchner F, Ferdy JB, Andalo C. Role of corridors in plant dispersal: An example with the endangered *Ranunculus nodiflorus*. *Conserv Biol*. 2003; 17: 401–410.
79. Cirujano S, Medina L. Plantas acuáticas de las lagunas y humedales de Castilla-La Mancha. CSIC—Junta de Comunidades de Castilla-La Mancha, Madrid; 2002.
80. Fraga-Arguimbau P. International conference on Mediterranean temporary ponds: proceedings & abstracts, Menorca, 5–8 May. Col·lecció recerca, 14. Institut Menorquí d'Estudis, Maó; 2009.
81. Brendonck L, Williams W. Biodiversity in wetlands of dry regions (drylands). In *Biodiversity in wetlands: assessment, function and conservation edition 1*. Gopal B, Junk W, Davis J, editors. Backhuys Publishers (Leiden, The Netherlands); 2000. pp. 181–194.
82. Warwick NWM, Brock MA. Plant reproduction in temporary wetlands: the effects of seasonal timing, depth, and duration of flooding. *Aquat Bot*. 2003; 77: 153–167.
