# Supplementary material for: Pre-Holocene Origin for the Coronopus navasii Disjunction: Conservation Implications from Its Long Isolation
Source: PLOS journal article supplement (doi:10.1371/journal.pone.0159484), 2016-07-27

**A**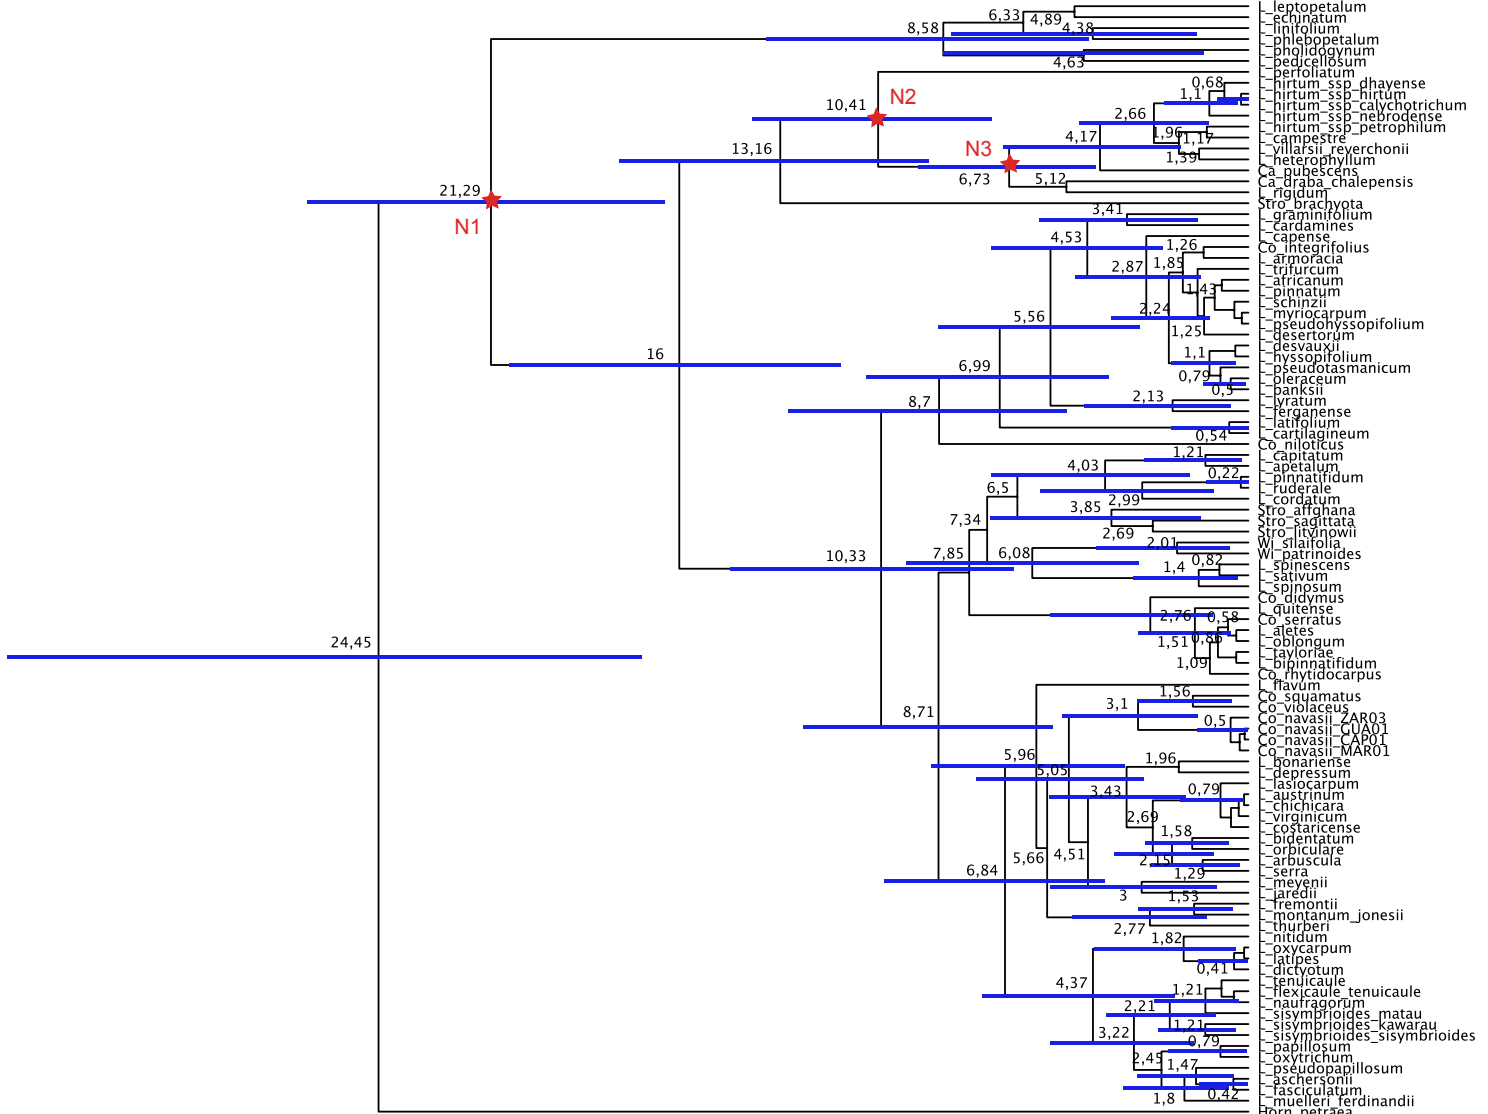**B**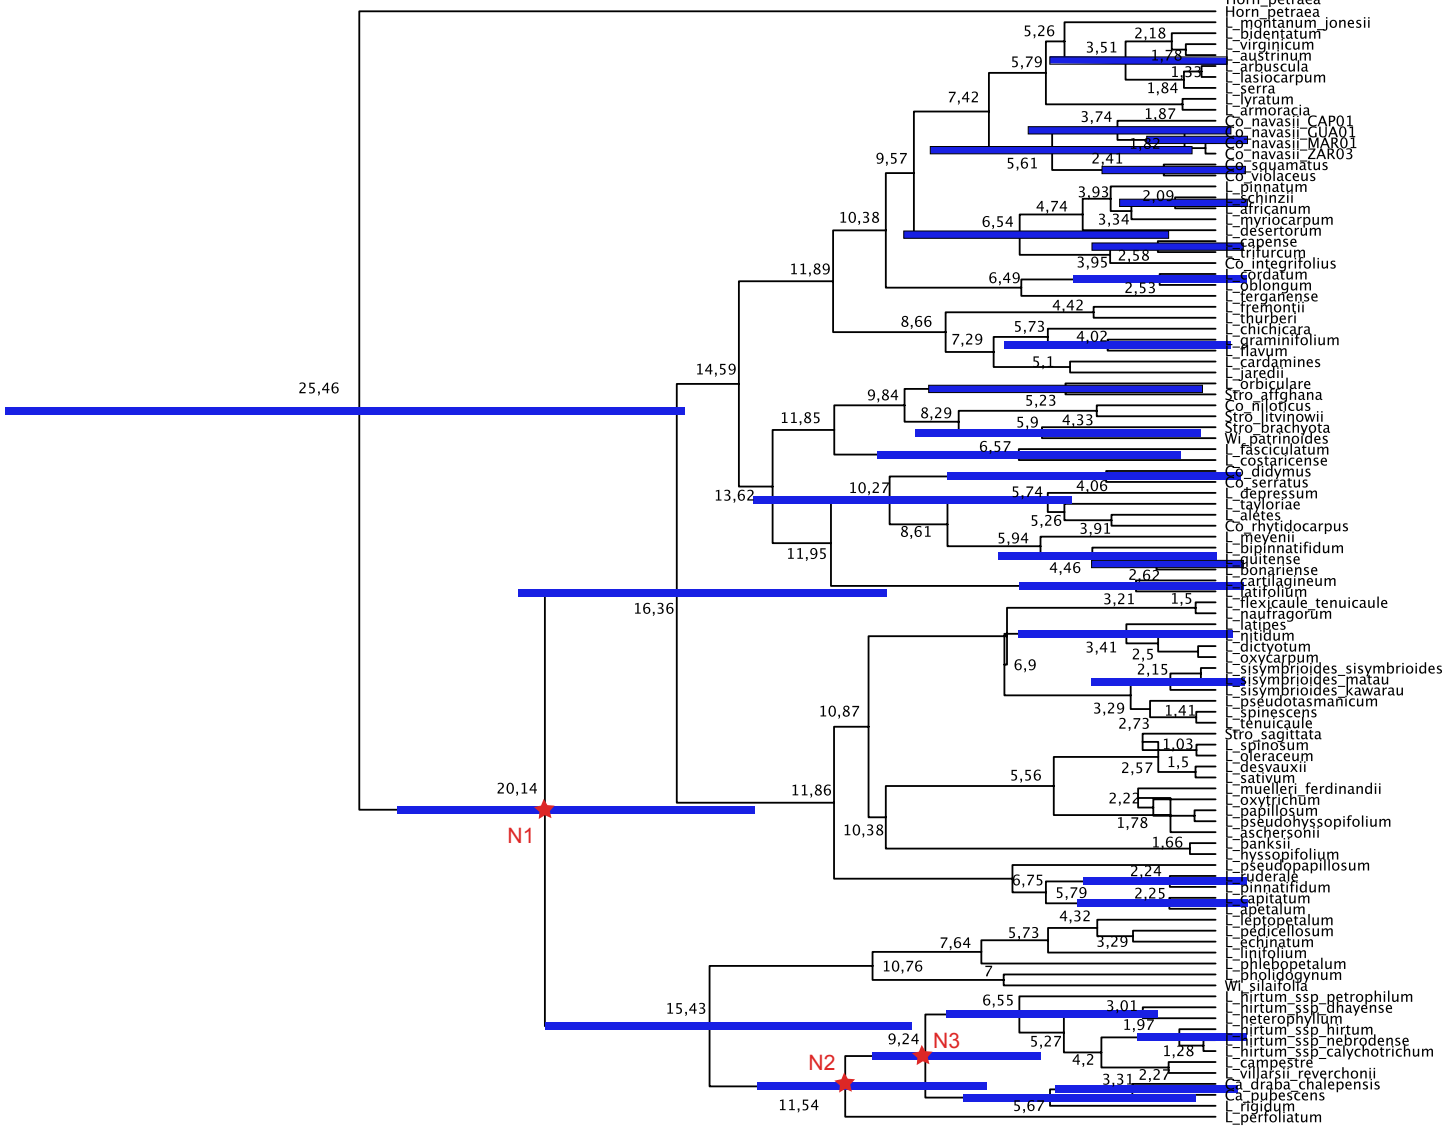

Supplement: S4 (10.1371/journal.pone.0159484.s004) [file journal.pone.0159484.s004]
